# Supplementary material for: Co-Amorphous Drug Formulations in Numbers: Recent Advances in Co-Amorphous Drug Formulations with Focus on Co-Formability, Molar Ratio, Preparation Methods, Physical Stability, In Vitro and In Vivo Performance, and New Formulation Strategies
Source: MDPI journal article supplement (doi:10.3390/pharmaceutics13030389), 2021-03-15
Supplement: s1 [file s1]

## Appendix D. Overview of studies discussing phospholipids and sugars as excipients for CAMS

| Drug          | Co-former                              | Co-former type | Preparation         | Amorphous | References |
|---------------|----------------------------------------|----------------|---------------------|-----------|------------|
| Ibuprofen     | Phospholipon 100                       | Phospholipids  | Solvent evaporation | N         | [1]        |
| Ibuprofen     | Phospholipon 100H                      | Phospholipids  | Solvent evaporation | N         | [1]        |
| Ibuprofen     | Dimyristoylphosphatidylglycerol (DMPG) | Phospholipids  | Solvent evaporation | N         | [1]        |
| Ibuprofen     | Dimyristoylphosphatidylcholine (DMPC)  | Phospholipids  | Solvent evaporation | N         | [1]        |
| Ibuprofen     | Dipalmitoylphosphatidylcholine (DPPC)  | Phospholipids  | Solvent evaporation | N         | [1]        |
| Ibuprofen     | Distearoylphosphatidylcholine (DSPC)   | Phospholipids  | Solvent evaporation | N         | [1]        |
| Ibuprofen     | Phospholipon 100                       | Phospholipids  | Solvent evaporation | N         | [1]        |
| Albendazole   | Monoacyl PC                            | Phospholipids  | Solvent evaporation | N         | [2]        |
| Celecoxib     | Monoacyl PC                            | Phospholipids  | Solvent evaporation | Y         | [2]        |
| Ezetimibe     | Monoacyl PC                            | Phospholipids  | Solvent evaporation | Y         | [2]        |
| Furosemide    | Monoacyl PC                            | Phospholipids  | Solvent evaporation | Y         | [2]        |
| Glibenclamide | Monoacyl PC                            | Phospholipids  | Solvent evaporation | N         | [2]        |
| Indomethacin  | Monoacyl PC                            | Phospholipids  | Solvent evaporation | Y         | [2]        |

|                   |             |                    |                     |   |     |
|-------------------|-------------|--------------------|---------------------|---|-----|
| Ketoprofen        | Monoacyl PC | Phospholip-<br>ids | Solvent evaporation | Y | [2] |
| Mebendazole       | Monoacyl PC | Phospholip-<br>ids | Solvent evaporation | N | [2] |
| Mefenamic<br>acid | Monoacyl PC | Phospholip-<br>ids | Solvent evaporation | N | [2] |
| Naproxen          | Monoacyl PC | Phospholip-<br>ids | Solvent evaporation | N | [2] |
| Phenytoin         | Monoacyl PC | Phospholip-<br>ids | Solvent evaporation | N | [2] |
| Probucol          | Monoacyl PC | Phospholip-<br>ids | Solvent evaporation | N | [2] |
| Sulfasalazine     | Monoacyl PC | Phospholip-<br>ids | Solvent evaporation | N | [2] |
| Sulfathiazole     | Monoacyl PC | Phospholip-<br>ids | Solvent evaporation | Y | [2] |
| Albendazole       | Diacyl PC   | Phospholip-<br>ids | Solvent evaporation | N | [2] |
| Celecoxib         | Diacyl PC   | Phospholip-<br>ids | Solvent evaporation | Y | [2] |
| Ezetimibe         | Diacyl PC   | Phospholip-<br>ids | Solvent evaporation | Y | [2] |
| Furosemide        | Diacyl PC   | Phospholip-<br>ids | Solvent evaporation | Y | [2] |
| Glibenclamide     | Diacyl PC   | Phospholip-<br>ids | Solvent evaporation | N | [2] |
| Indomethacin      | Diacyl PC   | Phospholip-<br>ids | Solvent evaporation | Y | [2] |
| Ketoprofen        | Diacyl PC   | Phospholip-<br>ids | Solvent evaporation | Y | [2] |
| Mebendazole       | Diacyl PC   | Phospholip-<br>ids | Solvent evaporation | N | [2] |
| Mefenamic<br>acid | Diacyl PC   | Phospholip-<br>ids | Solvent evaporation | N | [2] |

|               |                          |                    |                     |                       |      |
|---------------|--------------------------|--------------------|---------------------|-----------------------|------|
| Naproxen      | Diacyl PC                | Phospholip-<br>ids | Solvent evaporation | Y                     | [2]  |
| Phenytoin     | Diacyl PC                | Phospholip-<br>ids | Solvent evaporation | N                     | [2]  |
| Probucol      | Diacyl PC                | Phospholip-<br>ids | Solvent evaporation | N                     | [2]  |
| Sulfasalazine | Diacyl PC                | Phospholip-<br>ids | Solvent evaporation | N                     | [2]  |
| Sulfathiazole | Diacyl PC                | Phospholip-<br>ids | Solvent evaporation | Y                     | [2]  |
| Curcumin      | Chitosan oligosaccharide | Sugars             | Ball milling        | Y                     | [3]  |
| Indomethacin  | Octaacetylmaltose        | Sugars             | Melt-quench         | Y                     | [4]  |
| Indomethacin  | Octaacetylsucrose        | Sugars             | Melt-quench         | Y                     | [4]  |
| Indomethacin  | Pentaacetylglucose       | Sugars             | Melt-quench         | Y                     | [4]  |
| Indomethacin  | Octaacetylmaltose        | Sugars             | Melt-quench         | Y                     | [5]  |
| Naproxen      | Acetylated maltose       | Sugars             | Melt-quench         | Y                     | [6]  |
| Naproxen      | Acetylated sucrose       | Sugars             | Melt-quench         | Y                     | [6]  |
| Itraconazole  | Octaacetylmaltose        | Sugars             | Melt-quench         | Y                     | [7]  |
| Itraconazole  | Octaacetylsucrose        | Sugars             | Melt-quench         | Partly amor-<br>phous | [7]  |
| Itraconazole  | Pentaacetylglucose       | Sugars             | Melt-quench         | Partly amor-<br>phous | [7]  |
| Nifedipine    | Octaacetylmaltose        | Sugars             | Melt-quench         | Y                     | [8]  |
| Nifedipine    | Octaacetylsucrose        | Sugars             | Melt-quench         | Y                     | [8]  |
| Nifedipine    | Pentaacetylglucose       | Sugars             | Melt-quench         | N                     | [8]  |
| Nifedipine    | Pentaacetylgalactose     | Sugars             | Melt-quench         | N                     | [8]  |
| Clotrimazole  | Mannitol                 | Sugars             | Fusion process      | N                     | [9]  |
| Clotrimazole  | Fructose                 | Sugars             | Fusion process      | N                     | [9]  |
| Clotrimazole  | Dextrose                 | Sugars             | Fusion process      | Not mentioned         | [9]  |
| Clotrimazole  | Maltose                  | Sugars             | Fusion process      | Not mentioned         | [9]  |
| Indomethacin  | Maltose                  | Sugars             | Vacuum drying       | Y                     | [10] |
| Indomethacin  | Trehalose                | Sugars             | Vacuum drying       | Y                     | [10] |
| Indomethacin  | Maltitol                 | Sugars             | Vacuum drying       | Y                     | [10] |

|                 |                             |        |                               |   |      |
|-----------------|-----------------------------|--------|-------------------------------|---|------|
| Cinnamaldehyde  | Maltose                     | Sugars | Vacuum drying                 | Y | [11] |
| Indomethacin    | Glucose                     | Sugars | Melt-quench                   | Y | [12] |
| Carbamazepine   | D-glucosamide hydrochloride | Sugars | Solvent evaporation           | N | [13] |
| Nifedipine      | Mannitol                    | Sugars | Melt-quench                   | Y | [14] |
| Etoricoxib      | Lactose                     | Sugars | Solvent evaporation           | N | [15] |
| Etoricoxib      | Sucrose                     | Sugars | Solvent evaporation           | N | [15] |
| Etoricoxib      | Mannitol                    | Sugars | Solvent evaporation           | N | [15] |
| Sodium naproxen | Lactose                     | Sugars | Spray drying and ball milling | Y | [16] |
| Curcumin        | Dextrose                    | Sugars | Lag                           | N | [17] |
| Sulfamerazine   | Trehalose                   | Sugars | Cyromilling                   | N | [18] |
| Nifedipine      | Sucrose                     | Sugars | Melt-quench                   | N | [19] |
| Probucol        | Sucrose                     | Sugars | Melt-quench                   | N | [19] |
| Itraconazole    | Sucrose                     | Sugars | Melt-quench                   | N | [19] |
| Indomethacin    | Sucrose                     | Sugars | Melt-quench                   | N | [19] |
| Clotrimazole    | Sucrose                     | Sugars | Melt-quench                   | N | [19] |
| Carvedilol      | Sucrose                     | Sugars | Melt-quench                   | N | [19] |
| Celecoxib       | Octaacetylmaltose           | Sugars | Melt-quench                   | Y | [20] |
| Sucrose         | Dextran                     | Sugars | Freeze drying                 | Y | [21] |
| Sucrose         | Trehalose                   | Sugars | Freeze drying                 | Y | [21] |

## Reference

1. Hussain, M.D.; Saxena, V.; Brausch, J.F.; Talukder, R.M. Ibuprofen-phospholipid solid dispersions: improved dissolution and gastric tolerance. *Int J Pharm* **2012**, *422*, 290-294.
2. Gautschi, N.; Van Hoogevest, P.; Kuentz, M. Amorphous drug dispersions with mono- and diacyl lecithin: On molecular categorization of their feasibility and UV dissolution imaging. *Int J Pharm* **2015**, *491*, 218-230.
3. Huang, R.; Han, J.; Wang, R.; Zhao, X.; Qiao, H.; Chen, L.; Li, W.; Di, L.; Zhang, W.; Li, J. Surfactant-free solid dispersion of BCS class IV drug in an amorphous chitosan oligosaccharide matrix for concomitant dissolution in vitro - permeability increase. *Eur J Pharm Sci* **2019**, *130*, 147-155.
4. Kaminska, E.; Adrjanowicz, K.; Tarnacka, M.; Kolodziejczyk, K.; Dulski, M.; Mapesa, E.U.; Zakowiecki, D.; Hawelek, L.; Kaczmarczyk-Sedlak, I.; Kaminski, K. Impact of inter- and intra-molecular interactions on the physical stability of indomethacin dispersed in acetylated saccharides. *Mol Pharm* **2014**, *11*, 2935-2947.
5. Kaminska, E.; Adrjanowicz, K.; Zakowiecki, D.; Milanowski, B.; Tarnacka, M.; Hawelek, L.; Dulski, M.; Pilch, J.; Smolka, W.; Kaczmarczyk-Sedlak, I., et al. Enhancement of the physical stability of amorphous indomethacin by mixing it with octaacetylmaltose. inter and intra molecular studies. *Pharm Res* **2014**, *31*, 2887-2903.
6. Kaminska, E.; Madejczyk, O.; Tarnacka, M.; Jurkiewicz, K.; Kaminski, K.; Paluch, M. Studying of crystal growth and overall crystallization of naproxen from binary mixtures. *Eur J Pharm Biopharm* **2017**, *113*, 75-87.

7. Kaminska, E.; Tarnacka, M.; Kolodziejczyk, K.; Dulski, M.; Zakowiecki, D.; Hawelek, L.; Adrjanowicz, K.; Zych, M.; Garbacz, G.; Kaminski, K. Impact of low molecular weight excipient octaacetylmaltose on the liquid crystalline ordering and molecular dynamics in the supercooled liquid and glassy state of itraconazole. *Eur J Pharm Biopharm* **2014**, *88*, 1094-1104.
8. Kaminska, E.; Tarnacka, M.; Wlodarczyk, P.; Jurkiewicz, K.; Kolodziejczyk, K.; Dulski, M.; Haznar-Garbacz, D.; Hawelek, L.; Kaminski, K.; Wlodarczyk, A., et al. Studying the impact of modified saccharides on the molecular dynamics and crystallization tendencies of model api nifedipine. *Mol Pharm* **2015**, *12*, 3007-3019.
9. Madgulkar, A.; Bandivadekar, M.; Shid, T.; Rao, S. Sugars as solid dispersion carrier to improve solubility and dissolution of the BCS class II drug: clotrimazole. *Drug Dev Ind Pharm* **2015**, *42*, 28-38.
10. Takeda, K.; Gotoda, Y.; Hirota, D.; Hidaka, F.; Sato, T.; Matsuura, T.; Imanaka, H.; Ishida, N.; Imamura, K. Surfactant-free solid dispersions of hydrophobic drugs in an amorphous sugar matrix dried from an organic solvent. *Mol Pharm* **2017**, *14*, 791-798.
11. Satoh, T.; Hidaka, F.; Miyake, K.; Yoshiyama, N.; Takeda, K.; Matsuura, T.; Imanaka, H.; Ishida, N.; Imamura, K. Surfactant-free solid dispersion of fat-soluble flavour in an amorphous sugar matrix. *Food Chem* **2016**, *197*, 1136-1142.
12. Martinez, L.M.; Videa, M.; Lopez Silva, T.; Castro, S.; Caballero, A.; Lara-Diaz, V.J.; Castorena-Torres, F. Two-phase amorphous-amorphous solid drug dispersion with enhanced stability, solubility and bioavailability resulting from ultrasonic dispersion of an immiscible system. *Eur J Pharm Biopharm* **2017**, *119*, 243-252.
13. Al-Hamidi, H.; Edwards, A.A.; Mohammad, M.A.; Nokhodchi, A. To enhance dissolution rate of poorly water-soluble drugs: glucosamine hydrochloride as a potential carrier in solid dispersion formulations. *Colloids Surf B Biointerfaces* **2010**, *76*, 170-178.
14. Zajc, N.; Obreza, A.; Bele, M.; Srcic, S. Physical properties and dissolution behaviour of nifedipine/mannitol solid dispersions prepared by hot melt method. *Int J Pharm* **2005**, *291*, 51-58.
15. Das, A.; Nayak, A.K.; Mohanty, B.; Panda, S. Solubility and dissolution enhancement of etoricoxib by solid dispersion technique using sugar carriers. *ISRN Pharm* **2011**, *1*, 819765.
16. Sovago, I.; Wang, W.; Qiu, D.; Raijada, D.; Rantanen, J.; Grohgan, H.; Rades, T.; Bond, A.D.; Lobmann, K. Properties of the sodium naproxen-lactose-tetrahydrate co-crystal upon processing and storage. *Molecules* **2016**, *21*, 509.
17. Skieneh, J.M.; Sathisaran, I.; Dalvi, S.V.; Rohani, S. Co-amorphous form of curcumin-folic acid dihydrate with increased dissolution rate. *Cryst Growth Des* **2017**, *17*, 6273-6280.
18. Macfhionnghaile, P.; Hu, Y.; Gniado, K.; Curran, S.; McArdle, P.; Erxleben, A. Effects of ball-milling and cryomilling on sulfamerazine polymorphs: a quantitative study. *J Pharm Sci* **2014**, *103*, 1766-1778.
19. Mizoguchi, R.; Waraya, H.; Hirakura, Y. Application of co-amorphous technology for improving the physicochemical properties of amorphous formulations. *Mol Pharm* **2019**, *16*, 2142-2152.
20. Grzybowska, K.; Paluch, M.; Wlodarczyk, P.; Grzybowski, A.; Kaminski, K.; Hawelek, L.; Zakowiecki, D.; Kasprzycka, A.; Jankowska-Sumara, I. Enhancement of amorphous celecoxib stability by mixing it with octaacetylmaltose: the molecular dynamics study. *Mol Pharm* **2012**, *9*, 894-904.
21. Zografi, S.L.S.G. Enthalpy relaxation in binary amorphous mixtures containing sucrose. *Pharm Res* **1998**, *15*, 1828-1834.
