# Supplementary material for: Co-Amorphous Drug Formulations in Numbers: Recent Advances in Co-Amorphous Drug Formulations with Focus on Co-Formability, Molar Ratio, Preparation Methods, Physical Stability, In Vitro and In Vivo Performance, and New Formulation Strategies
Source: MDPI journal article supplement (doi:10.3390/pharmaceutics13030389), 2021-03-15
Supplement: s1 [file s1]

## Appendix B. Studies included in this review article as the base for data analysis

### Year 1989

Fukuoka E, Makita M, Yamamura S. Glassy state of pharmaceuticals. III: Thermal properties and stability of glassy pharmaceuticals and their binary glass systems. *Chemical and Pharmaceutical Bulletin*, 1989, 37: 1047-1050.

### Year 1996

Yamamura S, Momose Y, Takahashi K, Nagatani S. Solid-state interaction between cimetidine and naproxen. *Drug Stability*, 1996, 1: 173-178.

### Year 1998

Lu Q, Zografi G. Phase behavior of binary and ternary amorphous mixtures containing indomethacin, citric acid, and PVP. *Pharmaceutical Research*, 1998, 15: 1202-1206.

### Year 2000

Yamamura S, Gotoh H, Sakamoto Y, et al. Physicochemical properties of amorphous precipitates of cimetidine–indomethacin binary system. *European Journal of Pharmaceutics and Biopharmaceutics*, 2000, 49: 259-265.

### Year 2002

Yamamura S, Gotoh H, Sakamoto Y, et al. Physicochemical properties of amorphous salt of cimetidine and diflunisal system. *International Journal of Pharmaceutics*, 2002, 241: 213-221.

### Year 2007

1. Hoppu P, Jouppila K, Rantanen J, et al. Characterisation of blends of paracetamol and citric acid. *Journal of Pharmacy and Pharmacology*, 2007, 59: 373-381.

2. Ahuja N, Katore O P, Singh B. Studies on dissolution enhancement and mathematical modeling of drug release of a poorly water-soluble drug using water-soluble carriers. *European Journal of Pharmaceutics and Biopharmaceutics*, 2007, 65: 26-38.

### Year 2009

1. Allesø M, Chieng N, Rehder S, et al. Enhanced dissolution rate and synchronized release of drugs in binary systems through formulation: Amorphous naproxen–cimetidine mixtures prepared by mechanical activation. *Journal of Controlled Release*, 2009, 136: 45-53.

2. Chieng N, Aaltonen J, Saville D, et al. Physical characterization and stability of amorphous indomethacin and ranitidine hydrochloride binary systems prepared by mechanical activation. *European Journal of Pharmaceutics and Biopharmaceutics*, 2009, 71: 47-54.

3. Hoppu P, Virpioja J, Schantz S, et al. Characterization of ultrasound extrudated and cut citric acid/paracetamol blends[J]. *Journal of Pharmaceutical Sciences*, 2009, 98: 2140-2148.

4. Hoppu P, Virpioja J, Schantz S, et al. Characterization of ultrasound extrudated and cut citric acid/paracetamol blends[J]. *Journal of Pharmaceutical Sciences*, 2009, 98: 2140-2148.

5. Tantishaiyakul V, Songkro S, Suknuntha K, et al. Crystal structure transformations and dissolution studies of cimetidine–piroxicam coprecipitates and physical mixtures. *AAPS Pharmscitech*, 2009, 10: 789-795.

### Year 2010

1. Tantishaiyakul V, Suknuntha K, Vao-Soongnern V. Characterization of cimetidine–piroxicam coprecipitate interaction using experimental studies and molecular dynamic simulations. *AAPS Pharmscitech*, 2010, 11: 952-958.

2. Pajula K, Taskinen M, Lehto V P, et al. Predicting the formation and stability of amorphous small molecule binary mixtures from computationally determined Flory–Huggins interaction parameter and phase diagram. *Molecular Pharmaceutics*, 2010, 7: 795-804.

#### **Year 2011**

Löbmann K, Laitinen R, Grohgan H, et al. Coamorphous drug systems: enhanced physical stability and dissolution rate of indomethacin and naproxen. *Molecular Pharmaceutics*, 2011, 8: 1919-1928.

#### **Year 2012**

1. Löbmann K, Strachan C, Grohgan H, et al. Co-amorphous simvastatin and glipizide combinations show improved physical stability without evidence of intermolecular interactions. *European Journal of Pharmaceutics and Biopharmaceutics*, 2012, 81: 159-169.

2. Masuda T, Yoshihashi Y, Yonemochi E, et al. Cocrystallization and amorphization induced by drug–excipient interaction improves the physical properties of acyclovir. *International Journal of Pharmaceutics*, 2012, 422: 160-169.

#### **Year 2013**

1. Gao Y, Liao J, Qi X, et al. Coamorphous repaglinide–saccharin with enhanced dissolution. *International Journal of Pharmaceutics*, 2013, 450: 290-295.

2. Löbmann K, Grohgan H, Laitinen R, et al. Amino acids as co-amorphous stabilizers for poorly water soluble drugs–Part 1: Preparation, stability and dissolution enhancement. *European Journal of Pharmaceutics and Biopharmaceutics*, 2013, 85: 873-881.

3. Löbmann K, Laitinen R, Strachan C, et al. Amino acids as co-amorphous stabilizers for poorly water-soluble drugs–Part 2: Molecular interactions. *European Journal of Pharmaceutics and Biopharmaceutics*, 2013, 85: 882-888.

4. Löbmann K, Laitinen R, Grohgan H, et al. A theoretical and spectroscopic study of co-amorphous naproxen and indomethacin. *International Journal of Pharmaceutics*, 2013, 453: 80-87.

5. Shayanfar A, Ghavimi H, Hamishekar H, et al. Coamorphous atorvastatin calcium to improve its physicochemical and pharmacokinetic properties. *Journal of Pharmacy & Pharmaceutical Sciences*, 2013, 16: 577-587.

6. Shayanfar A, Jouyban A. Drug–drug coamorphous systems: characterization and physicochemical properties of coamorphous atorvastatin with carvedilol and glibenclamide. *Journal of Pharmaceutical Innovation*, 2013, 8: 218-228.

7. Paluch K J, McCabe T, Muller-Bunz H, et al. Formation and physicochemical properties of crystalline and amorphous salts with different stoichiometries formed between ciprofloxacin and succinic acid. *Molecular Pharmaceutics*, 2013, 10: 3640-3654.

8. Shimada Y, Goto S, Uchiro H, et al. Features of heat-induced amorphous complex between indomethacin and lidocaine. *Colloids and Surfaces B: Biointerfaces*, 2013, 102: 590-596.

9. Shimada Y, Goto S, Uchiro H, et al. Characteristics of amorphous complex formed between indomethacin and lidocaine hydrochloride. *Colloids and Surfaces B: Biointerfaces*, 2013, 105: 98-105.

#### **Year 2014**

1. Dengale S J, Ranjan O P, Hussien S S, et al. Preparation and characterization of co-amorphous Ritonavir–Indomethacin systems by solvent evaporation technique: Improved dissolution behavior and physical stability without evidence of intermolecular interactions. *European Journal of Pharmaceutical Sciences*, 2014, 62: 57-64.

2. Jensen K T, Löbmann K, Rades T, et al. Improving co-amorphous drug formulations by the addition of the highly water soluble amino acid, proline. *Pharmaceutics*, 2014, 6: 416-435.

3. Laitinen R, Löbmann K, Grohgan H, et al. Amino acids as co-amorphous excipients for simvastatin and glibenclamide: physical properties and stability. *Molecular Pharmaceutics*, 2014, 11: 2381-2389.

4. Macfheonnghaile P, Hu Y, Gniado K, et al. Effects of ball-milling and cryomilling on sulfamerazine polymorphs: a quantitative study. *Journal of Pharmaceutical Sciences*, 2014, 103: 1766-1778.

5. Martínez L M, Videira M, López-Silva G A, et al. Stabilization of amorphous paracetamol based systems using traditional and novel strategies. *International Journal of Pharmaceutics*, 2014, 477: 294-305.

6. Pajula K, Wittoek L, Lehto V P, et al. Phase separation in coamorphous systems: in silico prediction and the experimental challenge of detection. *Molecular Pharmaceutics*, 2014, 11: 2271-2279.
7. Hu Y, Gniado K, Erxleben A, et al. Mechanochemical reaction of sulfathiazole with carboxylic acids: Formation of a cocrystal, a salt, and coamorphous solids. *Crystal Growth & Design*, 2014, 14: 803-813.
8. Suresh K, Mannava M K C, Nangia A. A novel curcumin–artemisinin coamorphous solid: physical properties and pharmacokinetic profile. *Rsc Advances*, 2014, 4: 58357-58361.
9. Bounartzi M, Panagopoulou A, Kantiranis N, et al. Effect of plasticiser type on the hot melt extrusion of venlafaxine hydrochloride. *Journal of Pharmacy and Pharmacology*, 2014, 66: 297-308.

#### **Year 2015**

1. Ali A M A, Ali A A, Maghrabi I A. Clozapine-carboxylic acid plasticized co-amorphous dispersions: Preparation, characterization and solution stability evaluation. *Acta Pharmaceutica*, 2015, 65: 133-146.
2. Beyer A, Grohgan H, Löbmann K, et al. Multivariate quantification of the solid state phase composition of co-amorphous naproxen-indomethacin. *Molecules*, 2015, 20: 19571-19587.
3. Craye G, Löbmann K, Grohgan H, et al. Characterization of amorphous and co-amorphous simvastatin formulations prepared by spray drying. *Molecules*, 2015, 20: 21532-21548.
4. Heikkinen A T, DeClerck L, Löbmann K, et al. Dissolution properties of co-amorphous drug-amino acid formulations in buffer and biorelevant media. *Die Pharmazie-An International Journal of Pharmaceutical Sciences*, 2015, 70: 452-457.
5. Jensen K T, Larsen F H, Cornett C, et al. Formation mechanism of coamorphous drug–amino acid mixtures. *Molecular Pharmaceutics*, 2015, 12: 2484-2492.
6. Knapik J, Wojnarowska Z, Grzybowska K, et al. Molecular dynamics and physical stability of coamorphous ezetimib and indapamide mixtures. *Molecular Pharmaceutics*, 2015, 12: 3610-3619.
7. Lenz E, Jensen K T, Blaabjerg L I, et al. Solid-state properties and dissolution behaviour of tablets containing co-amorphous indomethacin–arginine. *European Journal of Pharmaceutics and Biopharmaceutics*, 2015, 96: 44-52.
8. Wickström H, Palo M, Rijckaert K, et al. Improvement of dissolution rate of indomethacin by inkjet printing. *European Journal of Pharmaceutical Sciences*, 2015, 75: 91-100.
9. Dengale S J, Hussien S S, Krishna B S M, et al. Fabrication, solid state characterization and bioavailability assessment of stable binary amorphous phases of Ritonavir with Quercetin. *European Journal of Pharmaceutics and Biopharmaceutics*, 2015, 89: 329-338.
10. Qian S, Heng W, Wei Y, et al. Coamorphous lurasidone hydrochloride–saccharin with charge-assisted hydrogen bonding interaction shows improved physical stability and enhanced dissolution with pH-independent solubility behavior. *Crystal Growth & Design*, 2015, 15: 2920-2928.
11. Teja A, Musmade P B, Khade A B, et al. Simultaneous improvement of solubility and permeability by fabricating binary glassy materials of talinolol with naringin: Solid state characterization, in-vivo in-situ evaluation. *European Journal of Pharmaceutical Sciences*, 2015, 78: 234-244.

#### **Year 2016**

1. Ali A M A, Al-Remawi M M A. Freeze dried quetiapine-nicotinamide binary solid dispersions: A new strategy for improving physicochemical properties and ex vivo diffusion. *Journal of Pharmaceutics*, 2016, 2016:1-11.
2. Beyer A, Radi L, Grohgan H, et al. Preparation and recrystallization behavior of spray-dried co-amorphous naproxen–indomethacin. *European Journal of Pharmaceutics and Biopharmaceutics*, 2016, 104: 72-81.
3. Beyer A, Grohgan H, Löbmann K, et al. Influence of the cooling rate and the blend ratio on the physical stability of co-amorphous naproxen/indomethacin. *European Journal of Pharmaceutics and Biopharmaceutics*, 2016, 109: 140-148.
4. Corner P A, Harburn J J, Steed J W, et al. Stabilisation of an amorphous form of ROY through a predicted co-former interaction. *Chemical Communications*, 2016, 52: 6537-6540.

5. Gniado K, Löbmann K, Rades T, et al. The influence of co-formers on the dissolution rates of co-amorphous sulfamerazine/excipient systems. *International Journal of Pharmaceutics*, 2016, 504: 20-26.
6. Jensen K T, Blaabjerg L I, Lenz E, et al. Preparation and characterization of spray-dried co-amorphous drug–amino acid salts. *Journal of Pharmacy and Pharmacology*, 2016, 68: 615-624.
7. Jensen K T, Larsen F H, Löbmann K, et al. Influence of variation in molar ratio on co-amorphous drug-amino acid systems. *European Journal of Pharmaceutics and Biopharmaceutics*, 2016, 107: 32-39.
8. Kasten G, Grohgan H, Rades T, et al. Development of a screening method for co-amorphous formulations of drugs and amino acids. *European Journal of Pharmaceutical Sciences*, 2016, 95: 28-35.
9. Lim A W, Löbmann K, Grohgan H, et al. Investigation of physical properties and stability of indomethacin–cimetidine and naproxen–cimetidine co-amorphous systems prepared by quench cooling, coprecipitation and ball milling. *Journal of Pharmacy and Pharmacology*, 2016, 68: 36-45.
10. Maher E M, Ali A M A, Salem H F, et al. In vitro/in vivo evaluation of an optimized fast dissolving oral film containing olanzapine co-amorphous dispersion with selected carboxylic acids. *Drug Delivery*, 2016, 23: 3088-3100.
11. Martínez L M, Videa M, Sosa N G, et al. Long-term stability of new co-amorphous drug binary systems: study of glass transitions as a function of composition and shelf time. *Molecules*, 2016, 21: 1712-1725.
12. Riekes M K, Engelen A, Appeltans B, et al. New perspectives for fixed dose combinations of poorly water-soluble compounds: a case study with ezetimibe and lovastatin. *Pharmaceutical Research*, 2016, 33: 1259-1275.
13. Russo M G, Sancho M I, Silva L M A, et al. Looking for the interactions between omeprazole and amoxicillin in a disordered phase. an experimental and theoretical study. *Spectrochimica Acta Part A: Molecular and Biomolecular Spectroscopy*, 2016, 156: 70-77.
14. Sovago I, Wang W, Qiu D, et al. Properties of the sodium naproxen-lactose-tetrahydrate co-crystal upon processing and storage. *Molecules*, 2016, 21: 509-522.
15. Ueda H, Muranushi N, Sakuma S, et al. A strategy for co-former selection to design stable co-amorphous formations based on physicochemical properties of non-steroidal inflammatory drugs. *Pharmaceutical Research*, 2016, 33: 1018-1029.
16. Wairkar S, Gaud R. Co-amorphous combination of nateglinide-metformin hydrochloride for dissolution enhancement. *AAPS PharmSciTech*, 2016, 17: 673-681.
17. Yamamoto K, Kojima T, Karashima M, et al. Physicochemical evaluation and developability assessment of co-amorphouses of low soluble drugs and comparison to the co-crystals. *Chemical and Pharmaceutical Bulletin*, 2016, 64: 1739-1746.
18. Han Y, Pan Y, Lv J, et al. Powder grinding preparation of co-amorphous  $\beta$ -azelnidipine and maleic acid combination: molecular interactions and physicochemical properties. *Powder Technology*, 2016, 291: 110-120.
19. Qian S, Li Z, Heng W, et al. Charge-assisted intermolecular hydrogen bond formed in coamorphous system is important to relieve the pH-dependent solubility behavior of lurasidone hydrochloride. *RSC Advances*, 2016, 6: 106396-106412.

#### **Year 2017**

1. Arnfast L, Kamruzzaman M, Löbmann K, et al. Melt extrusion of high-dose co-amorphous drug-drug combinations. *Pharmaceutical Research*, 2017, 34: 2689-2697.
2. Beyer A, Grohgan H, Löbmann K, et al. Improvement of the physicochemical properties of Co-amorphous naproxen-indomethacin by naproxen-sodium. *International Journal of Pharmaceutics*, 2017, 526: 88-94.
3. Bi Y, Xiao D, Ren S, et al. The binary system of ibuprofen-nicotinamide under nanoscale confinement: from cocrystal to coamorphous state. *Journal of Pharmaceutical Sciences*, 2017, 106: 3150-3155.
4. Haneef J, Chadha R. Drug-drug multicomponent solid forms: cocrystal, coamorphous and eutectic of three poorly soluble antihypertensive drugs using mechanochemical approach. *AAPS PharmSciTech*, 2017, 18: 2279-2290.

5. Huang Y, Zhang Q, Wang J R, et al. Amino acids as co-amorphous excipients for tackling the poor aqueous solubility of valsartan. *Pharmaceutical Development and Technology*, 2017, 22: 69-76.
6. Kasten G, Nouri K, Grohgan H, et al. Performance comparison between crystalline and co-amorphous salts of indomethacin-lysine. *International Journal of Pharmaceutics*, 2017, 533: 138-144.
7. Lenz E, Löbmann K, Rades T, et al. Hot melt extrusion and spray drying of co-amorphous indomethacin-arginine with polymers. *Journal of Pharmaceutical Sciences*, 2017, 106: 302-312.
8. Moinuddin S M, Ruan S, Huang Y, et al. Facile formation of co-amorphous atenolol and hydrochlorothiazide mixtures via cryogenic-milling: enhanced physical stability, dissolution and pharmacokinetic profile. *International Journal of Pharmaceutics*, 2017, 532: 393-400.
9. Ojarinta R, Heikkinen A T, Sievänen E, et al. Dissolution behavior of co-amorphous amino acid-indomethacin mixtures: The ability of amino acids to stabilize the supersaturated state of indomethacin. *European Journal of Pharmaceutics and Biopharmaceutics*, 2017, 112: 85-95.
10. Ojarinta R, Lermineaux L, Laitinen R. Spray drying of poorly soluble drugs from aqueous arginine solution. *International Journal of Pharmaceutics*, 2017, 532: 289-298.
11. Pan Y, Pang W, Lv J, et al. Solid state characterization of azelnidipine-oxalic acid co-crystal and co-amorphous complexes: The effect of different azelnidipine polymorphs. *Journal of Pharmaceutical and Biomedical Analysis*, 2017, 138: 302-315.
12. Pang W, Lv J, Du S, et al. Preparation of curcumin-piperazine coamorphous phase and fluorescence spectroscopic and density functional theory simulation studies on the interaction with bovine serum albumin. *Molecular Pharmaceutics*, 2017, 14: 3013-3024.
13. Petry I, Löbmann K, Grohgan H, et al. Solid state properties and drug release behavior of co-amorphous indomethacin-arginine tablets coated with Kollicoat® Protect. *European Journal of Pharmaceutics and Biopharmaceutics*, 2017, 119: 150-160.
14. Renuka, Singh S K, Gulati M, et al. Stable amorphous binary systems of glipizide and atorvastatin powders with enhanced dissolution profiles: formulation and characterization. *Pharmaceutical Development and Technology*, 2017, 22: 13-25.
15. Skieneh J M, Sathisaran I, Dalvi S V, et al. Co-amorphous form of curcumin-folic acid dihydrate with increased dissolution rate. *Crystal Growth & Design*, 2017, 17: 6273-6280.
16. Ueda H, Kadota K, Imono M, et al. Co-amorphous formation induced by combination of tranilast and diphenhydramine hydrochloride. *Journal of Pharmaceutical Sciences*, 2017, 106: 123-128.
17. Walker G, Römann P, Poller B, et al. Probing pharmaceutical mixtures during milling: The potency of low-frequency Raman spectroscopy in identifying disorder. *Molecular Pharmaceutics*, 2017, 14: 4675-4684.
18. Wang J, Chang R, Zhao Y, et al. Coamorphous loratadine-citric acid system with enhanced physical stability and bioavailability. *AAPS PharmSciTech*, 2017, 18: 2541-2550.
19. Sterren V B, Aiassa V, Garnerio C, et al. Preparation of chloramphenicol/amino acid combinations exhibiting enhanced dissolution rates and reduced drug-induced oxidative stress. *AAPS PharmSciTech*, 2017, 18: 2910-2918.
20. Liu X, Zhou L, Zhang F. Reactive melt extrusion to improve the dissolution performance and physical stability of naproxen amorphous solid dispersions. *Molecular Pharmaceutics*, 2017, 14: 658-673.

## **Year 2018**

1. Abdelquader M M, Essa E A, El Maghraby G M. Inhibition of Co-crystallization of olmesartan medoxomil and hydrochlorothiazide for enhanced dissolution rate in their fixed dose combination. *AAPS PharmSciTech*, 2019, 20: 1-12.
2. Ainurofiq A, Mauludin R, Mudhakir D, et al. A novel desloratadine-benzoic acid co-amorphous solid: Preparation, characterization, and stability evaluation. *Pharmaceutics*, 2018, 10: 85.
3. An J H, Lim C, Kiyonga A N, et al. Co-amorphous screening for the solubility enhancement of poorly water-soluble mirabegron and investigation of their intermolecular interactions and dissolution behaviors. *Pharmaceutics*, 2018, 10: 149.

4. Anand V S K, Sakhare S D, Sree K S N, et al. The relevance of co-amorphous formulations to develop supersaturated dosage forms: In-vitro, and ex-vivo investigation of Ritonavir-Lopinavir co-amorphous materials. *European Journal of Pharmaceutical Sciences*, 2018, 123: 124-134.
5. Fung M H, DeVault M, Kuwata K T, et al. Drug-exciipient interactions: effect on molecular mobility and physical stability of ketoconazole–organic acid coamorphous systems. *Molecular Pharmaceutics*, 2018, 15: 1052-1061.
6. Fung M, Bērziņš K, Suryanarayanan R. Physical stability and dissolution behavior of ketoconazole–organic acid coamorphous systems. *Molecular Pharmaceutics*, 2018, 15: 1862-1869.
7. Gniado K, MacFhionnghaile P, McArdle P, et al. The natural bile acid surfactant sodium taurocholate (NaTC) as a coformer in coamorphous systems: Enhanced physical stability and dissolution behavior of coamorphous drug–NaTc systems. *International Journal of Pharmaceutics*, 2018, 535: 132-139.
8. Kasten G, Lobo L, Dengale S, et al. In vitro and in vivo comparison between crystalline and co-amorphous salts of naproxen-arginine. *European Journal of Pharmaceutics and Biopharmaceutics*, 2018, 132: 192-199.
9. Kissi E O, Kasten G, Löbmann K, et al. The role of glass transition temperatures in coamorphous drug–amino acid formulations. *Molecular Pharmaceutics*, 2018, 15: 4247-4256.
10. Knapik-Kowalczyk J, Tu W, Chmiel K, et al. Co-Stabilization of amorphous pharmaceuticals—the case of nifedipine and nimodipine. *Molecular Pharmaceutics*, 2018, 15: 2455-2465.
11. Mannava M K, Suresh K, Kumar Bommaka M, et al. Curcumin-artemisinin coamorphous solid: Xenograft model preclinical study. *Pharmaceutics*, 2018, 10: 7-23.
12. Martínez-Jiménez C, Cruz-Angeles J, Videa M, et al. Co-amorphous simvastatin-nifedipine with enhanced solubility for possible use in combination therapy of hypertension and hypercholesterolemia. *Molecules*, 2018, 23(9): 2161-2174.
13. Meng-Lund H, Kasten G, Jensen K T, et al. The use of molecular descriptors in the development of co-amorphous formulations. *European Journal of Pharmaceutical Sciences*, 2018, 119: 31-38.
14. Mishra J, Rades T, Löbmann K, et al. Influence of solvent composition on the performance of spray-dried co-amorphous formulations. *Pharmaceutics*, 2018, 10(2): 47-60.
15. Mishra J, Löbmann K, Grohgan H, et al. Influence of preparation technique on co-amorphization of carvedilol with acidic amino acids. *International Journal of Pharmaceutics*, 2018, 552: 407-413.
16. Ojarinta R, Saarinen J, Strachan C J, et al. Preparation and characterization of multi-component tablets containing co-amorphous salts: Combining multimodal non-linear optical imaging with established analytical methods. *European Journal of Pharmaceutics and Biopharmaceutics*, 2018, 132: 112-126.
17. Petry I, Löbmann K, Grohgan H, et al. Undesired co-amorphisation of indomethacin and arginine during combined storage at high humidity conditions. *International Journal of Pharmaceutics*, 2018, 544: 172-180.
18. Petry I, Löbmann K, Grohgan H, et al. In situ co-amorphisation of arginine with indomethacin or furosemide during immersion in an acidic medium—A proof of concept study[J]. *European Journal of Pharmaceutics and Biopharmaceutics*, 2018, 133: 151-160.
19. Ruponen M, Visti M, Ojarinta R, et al. Permeability of glibenclamide through a PAMPA membrane: the effect of co-amorphization. *European Journal of Pharmaceutics and Biopharmaceutics*, 2018, 129: 247-256.
20. Russo M G, Baldoni H A, Dávila Y A, et al. Rational Design of a Famotidine–Ibuprofen Coamorphous System: An Experimental and Theoretical Study. *The Journal of Physical Chemistry B*, 2018, 122: 8772-8782.
21. Ueda H, Wu W, Löbmann K, et al. Application of a salt coformer in a co-amorphous drug system dramatically enhances the glass transition temperature: a case study of the ternary system carbamazepine, citric acid, and l-arginine. *Molecular Pharmaceutics*, 2018, 15: 2036-2044.
22. Wu W, Ueda H, Löbmann K, et al. Organic acids as co-formers for co-amorphous systems—Influence of variation in molar ratio on the physicochemical properties of the co-amorphous systems. *European Journal of Pharmaceutics and Biopharmaceutics*, 2018, 131: 25-32.

23. Wu W, Löbmann K, Schnitzkewitz J, et al. Aspartame as a co-former in co-amorphous systems. *International Journal of Pharmaceutics*, 2018, 549: 380-387.
24. Wu W, Löbmann K, Rades T, et al. On the role of salt formation and structural similarity of co-formers in co-amorphous drug delivery systems. *International Journal of Pharmaceutics*, 2018, 535: 86-94.
25. Zhu S, Gao H, Babu S, et al. Co-amorphous formation of high-dose zwitterionic compounds with amino acids to improve solubility and enable parenteral delivery. *Molecular Pharmaceutics*, 2018, 15: 97-107.

#### Year 2019

1. Hashim Ali K, Mohsin Ansari M, Ali Shah F, et al. Enhanced dissolution of valsartan-vanillin binary co-amorphous system loaded in mesoporous silica particles. *Journal of Microencapsulation*, 2019, 36: 10-20.
2. Aljohani M, MacFhionnghaile P, McArdle P, et al. Investigation of the formation of drug-drug cocrystals and coamorphous systems of the antidiabetic drug gliclazide. *International Journal of Pharmaceutics*, 2019, 561: 35-42.
3. Bohr A, Nascimento T L, Harmankaya N, et al. Efflux inhibitor bicalutamide increases oral bioavailability of the poorly soluble efflux substrate docetaxel in co-amorphous anti-cancer combination therapy. *Molecules*, 2019, 24: 266-279.
4. Chieng N, Teo X J, Cheah M H, et al. Molecular dynamics and physical stability of pharmaceutical co-amorphous systems: Correlation between structural relaxation times measured by Kohlrausch-Williams-Watts with the width of the glass transition temperature ( $\Delta T_g$ ) and the onset of crystallization. *Journal of Pharmaceutical Sciences*, 2019, 108: 3848-3858.
5. Cruz-Angeles J, Videa M, Martínez L M. Highly soluble glimepiride and irbesartan co-amorphous formulation with potential application in combination therapy. *AAPS PharmSciTech*, 2019, 20: 1-12.
6. Elfakhri R, Burley J C. Investigation of potential amorphisation and co-amorphisation behaviour of the benzene di-carboxylic acids upon cryo-milling. *Molecules*, 2019, 24: 3990-4003.
7. Fung M H, Suryanarayanan R. Effect of organic acids on molecular mobility, physical stability, and dissolution of ternary ketoconazole spray-dried dispersions. *Molecular Pharmaceutics*, 2018, 16: 41-48.
8. Hirakawa Y, Ueda H, Miyano T, et al. New insight into transdermal drug delivery with supersaturated formulation based on co-amorphous system. *International Journal of Pharmaceutics*, 2019, 569: 118582-118589.
9. Kasten G, Löbmann K, Grohgan H, et al. Co-former selection for co-amorphous drug-amino acid formulations. *International Journal of Pharmaceutics*, 2019, 557: 366-373.
10. Kasten G, Duarte Í, Paisana M, et al. Process optimization and upscaling of spray-dried drug-amino acid co-amorphous formulations. *Pharmaceutics*, 2019, 11: 24-35.
11. Kissi E O, Khorami K, Rades T. Determination of Stable Co-Amorphous Drug-Drug Ratios from the Eutectic Behavior of Crystalline Physical Mixtures. *Pharmaceutics*, 2019, 11: 628-639.
12. Knapik-Kowalczyk J, Chmiel K, Jurkiewicz K, et al. Physical stability and viscoelastic properties of co-amorphous ezetimibe/simvastatin system. *Pharmaceutics*, 2019, 12(1): 40-55.
13. Lababidi N, Kissi E O, Elgaher W A M, et al. Spray-drying of inhalable, multifunctional formulations for the treatment of biofilms formed in cystic fibrosis. *Journal of Controlled Release*, 2019, 314: 62-71.
14. Leng D, Kissi E O, Löbmann K, et al. Design of inhalable solid dosage forms of budesonide and theophylline for pulmonary combination therapy. *AAPS PharmSciTech*, 2019, 20: 1-11.
15. Liu W, Liu Y, Huang J, et al. Identification and investigation of the vibrational properties of crystalline and co-amorphous drugs with Raman and terahertz spectroscopy. *Biomedical Optics Express*, 2019, 10: 4290-4304.
16. Lodagekar A, Chavan R B, Mannava M K C, et al. Co amorphous valsartan nifedipine system: Preparation, characterization, in vitro and in vivo evaluation. *European Journal of Pharmaceutical Sciences*, 2019, 139: 105048-105057.
17. Lu W, Rades T, Rantanen J, et al. Inhalable co-amorphous budesonide-arginine dry powders prepared by spray drying. *International Journal of Pharmaceutics*, 2019, 565: 1-8.

18. Lu W, Rades T, Rantanen J, et al. Amino acids as stabilizers for spray-dried simvastatin powder for inhalation. *International Journal of Pharmaceutics*, 2019, 572: 118724-118736.
19. Mizoguchi R, Waraya H, Hirakura Y. Application of co-amorphous technology for improving the physicochemical properties of amorphous formulations. *Molecular Pharmaceutics*, 2019, 16: 2142-2152.
20. Pacult J, Rams-Baron M, Chmiel K, et al. How can we improve the physical stability of co-amorphous system containing flutamide and bicalutamide? The case of ternary amorphous solid dispersions. *European Journal of Pharmaceutical Sciences*, 2019, 136: 104947-104956.
21. Petry I, Löbmann K, Grohgan H, et al. In situ co-amorphisation in coated tablets–The combination of carvedilol with aspartic acid during immersion in an acidic medium. *International Journal of Pharmaceutics*, 2019, 558: 357-366.
22. Phan A D, Knapik-Kowalczyk J, Paluch M, et al. Theoretical model for the structural relaxation time in coamorphous drugs. *Molecular Pharmaceutics*, 2019, 16: 2992-2998.
23. Shi X, Song S, Ding Z, et al. Improving the solubility, dissolution, and bioavailability of Ibrutinib by preparing it in a coamorphous state with saccharin. *Journal of Pharmaceutical Sciences*, 2019, 108: 3020-3028.
24. Sormunen H, Ruponen M, Laitinen R. The effect of co-amorphization of glibenclamide on its dissolution properties and permeability through an MDCKII-MDR1 cell layer. *International Journal of Pharmaceutics*, 2019, 570: 118653-118664.
25. Wairkar S, Gaud R. Development and characterization of microstructured, spray-dried co-amorphous mixture of antidiabetic agents stabilized by silicate. *AAPS PharmSciTech*, 2019, 20: 1-10.
26. Wang R, Han J, Jiang A, et al. Involvement of metabolism-permeability in enhancing the oral bioavailability of curcumin in excipient-free solid dispersions co-formed with piperine. *International Journal of Pharmaceutics*, 2019, 561: 9-18.
27. Wang Z, Sun M, Liu T, et al. Co-amorphous solid dispersion systems of lacidipine-spironolactone with improved dissolution rate and enhanced physical stability. *Asian Journal of Pharmaceutical Sciences*, 2019, 14: 95-103.
28. Wei Y, Zhou S, Hao T, et al. Further enhanced dissolution and oral bioavailability of docetaxel by coamorphization with a natural P-gp inhibitor myricetin. *European Journal of Pharmaceutical Sciences*, 2019, 129: 21-30.
29. Wu W, Löbmann K, Schnitzkewitz J, et al. Dipeptides as co-formers in co-amorphous systems. *European Journal of Pharmaceutics and Biopharmaceutics*, 2019, 134: 68-76.
30. Wu W, Wang Y, Löbmann K, et al. Transformations between co-amorphous and co-crystal systems and their influence on the formation and physical stability of co-amorphous systems. *Molecular Pharmaceutics*, 2019, 16: 1294-1304.

## **Year 2020**

1. Adhikari B R, Bērziņš K, Fraser-Miller S J, et al. Co-amorphization of kanamycin with amino acids improves aerosolization. *Pharmaceutics*, 2020, 12: 715-734.
2. da Costa N F, Fernandes A I, Pinto J F. Measurement of the amorphous fraction of olanzapine incorporated in a co-amorphous formulation. *International Journal of Pharmaceutics*, 2020, 588: 119716-119727.
3. Fael H, Demirel A L. Tannic acid as a co-former in co-amorphous systems: Enhancing their physical stability, solubility and dissolution behavior. *International Journal of Pharmaceutics*, 2020, 581: 119284-119294.
4. França M T, Marcos T M, Pereira R N, et al. Could the small molecules such as amino acids improve aqueous solubility and stabilize amorphous systems containing griseofulvin? *European Journal of Pharmaceutical Sciences*, 2020, 143: 105178-105786.
5. Heng W, Su M, Cheng H, et al. Incorporation of complexation into a coamorphous system dramatically enhances dissolution and eliminates gelation of amorphous lurasidone hydrochloride. *Molecular Pharmaceutics*, 2019, 17: 84-97.
6. Kilpeläinen T, Pajula K, Ervasti T, et al. Raman imaging of amorphous-amorphous phase separation in small molecule co-amorphous systems. *European Journal of Pharmaceutics and Biopharmaceutics*, 2020, 155: 49-54.
7. Liu J, Rades T, Grohgan H. Determination of the optimal molar ratio in amino acid-based co-amorphous systems. *Molecular Pharmaceutics*, 2020, 17: 1335-1342.



8. Liu J, Grohgan H, Rades T. Influence of polymer addition on the amorphization, dissolution and physical stability of co-amorphous systems. *International Journal of Pharmaceutics*, 2020, 588: 119768-119777.
9. Mohammed A, Zurek J, Madueke S, et al. Generation of high dose inhalable effervescent dispersions against pseudomonas aeruginosa biofilms. *Pharmaceutical Research*, 2020, 37: 1-14.
10. Moinuddin S M, Shi Q, Tao J, et al. Enhanced physical stability and synchronized release of febuxostat and indomethacin in co-amorphous solids. *AAPS PharmSciTech*, 2020, 21: 1-10.
11. Pajula K, Hyyryläinen J, Koistinen A, et al. Detection of amorphous-amorphous phase separation in small molecular co-amorphous mixtures with SEM-EDS. *European Journal of Pharmaceutics and Biopharmaceutics*, 2020, 150: 43-49.
12. Park H, Seo H J, Hong S, et al. Characterization and therapeutic efficacy evaluation of glimepiride and L-arginine co-amorphous formulation prepared by supercritical antisolvent process: Influence of molar ratio and preparation methods. *International Journal of Pharmaceutics*, 2020, 581: 119232-119245.
13. Ruponen M, Rusanen H, Laitinen R. Dissolution and permeability properties of co-amorphous formulations of hydrochlorothiazide. *Journal of Pharmaceutical Sciences*, 2020, 109: 2252-2261.
14. Tawfeek H M, Chavan T, Kunda N K. Effect of spray drying on amorphization of indomethacin nicotinamide cocrystals: optimization, characterization, and stability study. *AAPS PharmSciTech*, 2020, 21: 1-13.
15. Ueda H, Bøtker J P, Edinger M, et al. Formulation of co-amorphous systems from naproxen and naproxen sodium and in situ monitoring of physicochemical state changes during dissolution testing by Raman spectroscopy. *International Journal of Pharmaceutics*, 2020, 587: 119662-119672.
16. Wang M, Liu S, Jia L, et al. Exploring the physical stability of three nimesulide–indomethacin co-amorphous systems from the perspective of molecular aggregates. *European Journal of Pharmaceutical Sciences*, 2020, 147: 105294-105304.
17. Wang S, Heng W, Wang X, et al. Coamorphization combined with complexation enhances dissolution of lurasidone hydrochloride and puerarin with synchronized release. *International Journal of Pharmaceutics*, 2020, 588: 119793-119806.
18. Wostry M, Plappert H, Grohgan H. Preparation of co-amorphous systems by freeze-drying. *Pharmaceutics*, 2020, 12: 941-953.
19. Yu D, Kan Z, Shan F, et al. Triple strategies to improve oral bioavailability by fabricating coamorphous forms of ursolic acid with piperine: enhancing water-solubility, permeability, and inhibiting cytochrome P450 isozymes. *Molecular Pharmaceutics*, 2020, 17: 4443-4462.
20. Zhang M, Suo Z, Peng X, et al. Microcrystalline cellulose as an effective crystal growth inhibitor for the ternary Ibrutinib formulation. *Carbohydrate Polymers*, 2020, 229: 115476-115485.
21. Zhang Y, Gao Y, Du X, et al. Combining co-amorphous-based spray drying with inert carriers to achieve improved bioavailability and excellent downstream manufacturability. *Pharmaceutics*, 2020, 12: 1063-1080.
22. Nair A, Varma R, Gourishetti K, et al. Influence of preparation methods on physicochemical and pharmacokinetic properties of co-amorphous formulations: the case of co-amorphous atorvastatin: naringin. *Journal of Pharmaceutical Innovation*, 2020, 15: 365-379.

## **Year 2021**

1. Chambers L I, Grohgan H, Palmelund H, et al. Predictive identification of co-formers in co-amorphous systems. *European Journal of Pharmaceutical Sciences*, 2021, 157: 105636-105645.
2. Veith H, Wiechert F, Luebbert C, et al. Combining crystalline and polymeric excipients in API solid dispersions—Opportunity or risk?. *European Journal of Pharmaceutics and Biopharmaceutics*, 2021, 158: 323-335.
3. Wu W, Grohgan H, Rades T, et al. Comparison of co-former performance in co-amorphous formulations: Single amino acids, amino acid physical mixtures, amino acid salts and dipeptides as co-formers. *European Journal of Pharmaceutical Sciences*, 2021, 156: 105582-105590.
4. Hirakawa Y, Ueda H, Takata Y, et al. Co-amorphous formation of piroxicam-citric acid to generate supersaturation and improve skin permeation. *European Journal of Pharmaceutical Sciences*, 2021, 158: 105667-105673.

5. Otsuka Y, Kuwashima W, Tanaka Y, et al. Effects of heat treatment on indomethacin-cimetidine mixture; Investigation of drug-drug interaction using singular value decomposition in FTIR spectroscopy. *Journal of Pharmaceutical Sciences*, 2021, 110: 1142-1147.
