# Supplementary material for: Co-Amorphous Drug Formulations in Numbers: Recent Advances in Co-Amorphous Drug Formulations with Focus on Co-Formability, Molar Ratio, Preparation Methods, Physical Stability, In Vitro and In Vivo Performance, and New Formulation Strategies
Source: MDPI journal article supplement (doi:10.3390/pharmaceutics13030389), 2021-03-15
Supplement: s1 [file s1]

## Appendix C. List of review articles focusing on co-amorphous drug formulations

| Title                                                                                                                                                                | Authors                                                                                            | Year | Publication                                           |
|----------------------------------------------------------------------------------------------------------------------------------------------------------------------|----------------------------------------------------------------------------------------------------|------|-------------------------------------------------------|
| Co amorphous systems: A product development perspective                                                                                                              | Rahul B. Chavan, Rajesh Thippa-raboina, Dinesh Kumar, Nalini R. Shastri                            | 2016 | International Journal of Pharmaceutics, 515, 403-415. |
| Recent advances in co-amorphous drug formulations                                                                                                                    | Swapnil Jayant Dengale, Holger Grohgan, Thomas Rades, Korbinian Löbmann                            | 2016 | Advanced Drug Delivery Reviews, 100, 116-125.         |
| Rational excipient selection for co-amorphous formulations                                                                                                           | Ossi Korhonen, Katja Pajula, Riikka Laitinen                                                       | 2017 | Expert Opinion on Drug Delivery, 14, 551-569.         |
| Supersaturating drug delivery systems: The potential of co-amorphous drug formulations                                                                               | Riikka Laitinen, Korbinian Löbmann, Holger Grohgan, Petra Priemel, Clare J. Strachan, Thomas Rades | 2017 | International Journal of Pharmaceutics, 532, 1-12.    |
| Co-amorphous solid dispersions for solubility and absorption improvement of drugs: Composition, preparation, characterization and formulations for oral delivery     | Anna Karagianni, Kyriakos Kachrimanis, Ioannis Nikolakakis                                         | 2018 | Pharmaceutics, 10, 98-123.                            |
| Co-amorphous active pharmaceutical ingredient-small molecule mixtures: Considerations in the choice of co-formers for enhancing dissolution and oral bioavailability | Ann Newman, Susan M. Reutzel-Edens, George Zograf                                                  | 2018 | Journal of Pharmaceutical Sciences, 107, 5-17.        |
| Advances in co-amorphous drug delivery systems                                                                                                                       | Qin Shi, Sakib M. Moinuddin, Ting Cai                                                              | 2019 | Acta Pharmaceutica Sinica B, 9, 19-35.                |
| Co-amorphous systems for the delivery of poorly water-soluble drugs: recent advances and an update                                                                   | Jiawei Han, Yuanfeng Wei, Yan Lu, Runze Wang, Jianjun Zhang, Yuan Gao, Shuai Qian                  | 2020 | Expert Opinion on Drug Delivery, 17, 1411-1435.       |
