# Supplementary material for: Co-Amorphous Drug Formulations in Numbers: Recent Advances in Co-Amorphous Drug Formulations with Focus on Co-Formability, Molar Ratio, Preparation Methods, Physical Stability, In Vitro and In Vivo Performance, and New Formulation Strategies
Source: MDPI journal article supplement (doi:10.3390/pharmaceutics13030389), 2021-03-15
Supplement: s1 [file s1]

# Supplementary Materials: Co-Amorphous Drug Formulations in Numbers: Recent Advances in Co-Amorphous Drug Formulations with Focus on Co-Formability, Molar Ratio, Preparation Methods, Physical Stability, In Vitro and In Vivo Performance, and New Formulation Strategies

Jingwen Liu, Holger Grohgan, Korbinian Löbmann, Thomas Rades and Nele-Johanna Hempel

**Table S1.** Overview of screened CAMS and non-CAMS with amino acids as co-formers. (y: yes. n: no. depends: different outcome depending on the used preparation method and/or parameters of the preparation method).

| Drug          | Co-former                | CAMS (y/no/depends) | References |
|---------------|--------------------------|---------------------|------------|
| Budesonide    | Arginine                 | y                   | [1]        |
| Carbamazepine | Arginine                 | n (ball milling)    | [2–6]      |
| Carbamazepine | Arginine-Tyrosin         | n (ball milling)    | [2]        |
| Carbamazepine | Phenylalanine-Tryptophan | y                   | [2]        |
| Carbamazepine | Arginine-Tryptophan      | y                   | [2]        |
| Carbamazepine | Tryptophan-Tyrosine      | n (ball milling)    | [2]        |
| Carbamazepine | Aspartic acid            | n (ball milling)    | [3–5]      |
| Carbamazepine | Cysteine                 | n (ball milling)    | [3–5]      |
| Carbamazepine | Glutamic acid            | n (ball milling)    | [3–5]      |
| Carbamazepine | Glycine                  | n (ball milling)    | [3–5]      |
| Carbamazepine | Histidine                | n (ball milling)    | [3–5]      |
| Carbamazepine | Lysine                   | n (ball milling)    | [3–5]      |
| Carbamazepine | Proline                  | n (ball milling)    | [3–5]      |
| Carbamazepine | Phenylalanine            | n (ball milling)    | [2–5]      |
| Carbamazepine | Tryptophan               | y                   | [2–5,7]    |
| Carbamazepine | Alanine                  | n (ball milling)    | [3–5]      |
| Carbamazepine | Asparagine               | n (ball milling)    | [3–5]      |
| Carbamazepine | Glutamine                | n (ball milling)    | [3–5]      |
| Carbamazepine | Isoleucine               | n (ball milling)    | [3–5]      |
| Carbamazepine | Leucine                  | n (ball milling)    | [3–5]      |
| Carbamazepine | Methionine               | n (ball milling)    | [3–5]      |
| Carbamazepine | Serine                   | n (ball milling)    | [3–5]      |
| Carbamazepine | Threonine                | n (ball milling)    | [3–5]      |
| Carbamazepine | Tyrosine                 | n (ball milling)    | [2–5]      |
| Carbamazepine | Valine                   | n (ball milling)    | [3–5]      |
| Carvedilol    | Arginine                 | n (ball milling)    | [3–5]      |
| Carvedilol    | Aspartic acid            | depends             | [3–5,8–11] |
| Carvedilol    | Cysteine                 | n (ball milling)    | [3–5]      |
| Carvedilol    | Glutamic acid            | depends             | [3–5,8]    |
| Carvedilol    | Glycine                  | n (ball milling)    | [3–5]      |
| Carvedilol    | Histidine                | n (ball milling)    | [3–5]      |
| Carvedilol    | Lysine                   | n (ball milling)    | [3–5]      |
| Carvedilol    | Proline                  | n (ball milling)    | [3–5]      |
| Carvedilol    | Phenylalanine            | y                   | [3–5,7]    |
| Carvedilol    | Tryptophan               | y                   | [3–5,7,12] |
| Carvedilol    | Alanine                  | n (ball milling)    | [3–5]      |
| Carvedilol    | Asparagine               | n (ball milling)    | [3–5]      |
| Carvedilol    | Glutamine                | n (ball milling)    | [3–5]      |

|                            |                                |                   |               |
|----------------------------|--------------------------------|-------------------|---------------|
| <b>Carvedilol</b>          | Isoleucine                     | y                 | [3–5,7]       |
| <b>Carvedilol</b>          | Leucine                        | y                 | [3–5,7]       |
| <b>Carvedilol</b>          | Methionine                     | y                 | [3–5,7]       |
| <b>Carvedilol</b>          | Serine                         | n (ball milling)  | [3–5]         |
| <b>Carvedilol</b>          | Threonine                      | n (ball milling)  | [3–5]         |
| <b>Carvedilol</b>          | Tyrosine                       | n (ball milling)  | [3–5]         |
| <b>Carvedilol</b>          | Valine                         | y                 | [3–5,7]       |
| <b>Chloramphenicol</b>     | Arginine                       | n (freeze drying) | [13]          |
| <b>Chloramphenicol</b>     | Cysteine                       | n (freeze drying) | [13]          |
| <b>Chloramphenicol</b>     | Glycine                        | n (freeze drying) | [13]          |
| <b>Chloramphenicol</b>     | Leucine                        | n (freeze drying) | [13]          |
| <b>Cimetidine</b>          | Arginine                       | y                 | [14]          |
| <b>Cimetidine</b>          | Citrulline                     | n (ball milling)  | [14]          |
| <b>Furosemide</b>          | Arginine                       | y                 | [3–5,7,14–16] |
| <b>Furosemide</b>          | Aspartic acid                  | n (ball milling)  | [3–5]         |
| <b>Furosemide</b>          | Cysteine                       | y                 | [3–5,7]       |
| <b>Furosemide</b>          | Glutamic acid                  | n (ball milling)  | [3–5]         |
| <b>Furosemide</b>          | Glycine                        | n (ball milling)  | [3–5]         |
| <b>Furosemide</b>          | Histidine                      | y                 | [3–5,7]       |
| <b>Furosemide</b>          | Lysine                         | y                 | [3–5,7]       |
| <b>Furosemide</b>          | Proline                        | y                 | [3–5,7]       |
| <b>Furosemide</b>          | Phenylalanine                  | y                 | [3–5,7]       |
| <b>Furosemide</b>          | Tryptophan                     | y                 | [3–5,7,16,17] |
| <b>Furosemide</b>          | Alanine                        | n (ball milling)  | [3–5]         |
| <b>Furosemide</b>          | Asparagine                     | n (ball milling)  | [3–5]         |
| <b>Furosemide</b>          | Glutamine                      | n (ball milling)  | [3–5]         |
| <b>Furosemide</b>          | Isoleucine                     | y                 | [3–5,7]       |
| <b>Furosemide</b>          | Leucine                        | y                 | [3–5,7]       |
| <b>Furosemide</b>          | Methionine                     | y                 | [3–5,7]       |
| <b>Furosemide</b>          | Serine                         | n (ball milling)  | [3–5]         |
| <b>Furosemide</b>          | Threonine                      | n (ball milling)  | [3–5]         |
| <b>Furosemide</b>          | Tyrosine                       | n (ball milling)  | [3–5]         |
| <b>Furosemide</b>          | Valine                         | y                 | [3–5,7]       |
| <b>Furosemide</b>          | Citrulline                     | y                 | [14]          |
| <b>Glibenclamide</b>       | Aspartic acid                  | n (ball milling)  | [18]          |
| <b>Glibenclamide</b>       | Lysine                         | n (ball milling)  | [18]          |
| <b>Glibenclamide</b>       | Serine                         | y                 | [18–20]       |
| <b>Glibenclamide</b>       | Threonine                      | y                 | [18,19]       |
| <b>Glibenclamide</b>       | Serin-Threonine                | y                 | [18,19]       |
| <b>Glibenclamide</b>       | Arginine                       | y                 | [20,21]       |
| <b>Glibenclamide</b>       | Arginine-Serine                | y                 | [21]          |
| <b>Glibenclamide</b>       | Arginine-Sodium lauryl sulfate | y                 | [20]          |
| <b>Glimepiride</b>         | Arginine                       | depends           | [22]          |
| <b>Griseofulvin</b>        | Aspartic acid                  | n (ball milling)  | [23]          |
| <b>Griseofulvin</b>        | Valine                         | n (ball milling)  | [23]          |
| <b>Griseofulvin</b>        | Methionine                     | n (ball milling)  | [23]          |
| <b>Griseofulvin</b>        | Lysine                         | n (ball milling)  | [23]          |
| <b>Griseofulvin</b>        | Tryptophan                     | y                 | [23]          |
| <b>Hydrochlorothiazide</b> | Arginine                       | y                 | [24]          |
| <b>Ibrutinib</b>           | Glutamic acid                  | n (ball milling)  | [25]          |
| <b>Ibrutinib</b>           | Arginine                       | n (ball milling)  | [25]          |

|                                 |                          |                  |                        |
|---------------------------------|--------------------------|------------------|------------------------|
| <b>Ibrutinib</b>                | Histidine                | n (ball milling) | [25]                   |
| <b>Ibrutinib</b>                | Glutamine                | n (ball milling) | [25]                   |
| <b>Ibrutinib</b>                | Valine                   | n (ball milling) | [25]                   |
| <b>Ibrutinib</b>                | Tyrosine                 | n (ball milling) | [25]                   |
| <b>Ibrutinib</b>                | Alanine                  | n (ball milling) | [25]                   |
| <b>Ibuprofen</b>                | Arginine                 | y                | [26,27]                |
| <b>Indomethacin</b>             | Arginine-Tyrosin         | n (ball milling) | [2]                    |
| <b>Indomethacin</b>             | Phenylalanine-Tryptophan | y                | [2]                    |
| <b>Indomethacin</b>             | Arginine-Phenylalanine   | y                | [2]                    |
| <b>Indomethacin</b>             | Tryptophan-Tyrosine      | n (ball milling) | [2]                    |
| <b>Indomethacin</b>             | Arginine                 | y                | [2–5,7,16,26–35]       |
| <b>Indomethacin</b>             | Aspartic acid            | n (ball milling) | [3–5]                  |
| <b>Indomethacin</b>             | Cysteine                 | n (ball milling) | [3–5]                  |
| <b>Indomethacin</b>             | Glutamic acid            | n (ball milling) | [3–5]                  |
| <b>Indomethacin</b>             | Glycine                  | n (ball milling) | [3–5]                  |
| <b>Indomethacin</b>             | Histidine                | depends          | [3–5,31,35]            |
| <b>Indomethacin</b>             | Lysine                   | depends          | [3–5,7,31,35,36]       |
| <b>Indomethacin</b>             | Proline                  | y                | [3–5,7]                |
| <b>Indomethacin</b>             | Phenylalanine            | y                | [2–5,7,29]             |
| <b>Indomethacin</b>             | Tryptophan               | y                | [2–5,7,12,16,17,29,37] |
| <b>Indomethacin</b>             | Alanine                  | n (ball milling) | [3–5]                  |
| <b>Indomethacin</b>             | Asparagine               | n (ball milling) | [3–5]                  |
| <b>Indomethacin</b>             | Glutamine                | n (ball milling) | [3–5]                  |
| <b>Indomethacin</b>             | Isoleucine               | y                | [3–5,7]                |
| <b>Indomethacin</b>             | Leucine                  | y                | [3–5,7]                |
| <b>Indomethacin</b>             | Methionine               | y                | [3–5,7]                |
| <b>Indomethacin</b>             | Serine                   | n (ball milling) | [3–5]                  |
| <b>Indomethacin</b>             | Threonine                | n (ball milling) | [3–5]                  |
| <b>Indomethacin</b>             | Tyrosine                 | n (ball milling) | [2–5]                  |
| <b>Indomethacin</b>             | Valine                   | y                | [3–5,7]                |
| <b>Kanamycin sulfate</b>        | Valine                   | y                | [38]                   |
| <b>Kanamycin sulfate</b>        | Methionine               | y                | [38]                   |
| <b>Kanamycin sulfate</b>        | Phenylalanine            | y                | [38]                   |
| <b>Kanamycin sulfate</b>        | Tryptophan               | y                | [38]                   |
| <b>Lurasidone hydrochloride</b> | Cysteine hydrochloride   | y                | [39]                   |
| <b>Mebendazole</b>              | Arginine                 | n (ball milling) | [3–5,14,40]            |
| <b>Mebendazole</b>              | Aspartic acid            | n (ball milling) | [3–5,41,42]            |
| <b>Mebendazole</b>              | Cysteine                 | n (ball milling) | [3–5]                  |
| <b>Mebendazole</b>              | Glutamic acid            | n (ball milling) | [3–5,40]               |
| <b>Mebendazole</b>              | Glycine                  | n (ball milling) | [3–5,42]               |
| <b>Mebendazole</b>              | Histidine                | n (ball milling) | [3–5,42]               |
| <b>Mebendazole</b>              | Lysine                   | y                | [3–5,7]                |
| <b>Mebendazole</b>              | Proline                  | depends          | [3–5,42]               |
| <b>Mebendazole</b>              | Phenylalanine            | depends          | [3–5,7,41,42]          |
| <b>Mebendazole</b>              | Tryptophan               | y                | [3–5,7,42]             |
| <b>Mebendazole</b>              | Alanine                  | n (ball milling) | [3–5]                  |
| <b>Mebendazole</b>              | Asparagine               | n (ball milling) | [3–5]                  |
| <b>Mebendazole</b>              | Glutamine                | n (ball milling) | [3–5]                  |
| <b>Mebendazole</b>              | Isoleucine               | y                | [3–5,7]                |
| <b>Mebendazole</b>              | Leucine                  | y                | [3–5,7]                |
| <b>Mebendazole</b>              | Methionine               | y                | [3–5,7]                |

|                       |                                        |                   |                     |
|-----------------------|----------------------------------------|-------------------|---------------------|
| <b>Mebendazole</b>    | Serine                                 | n (ball milling)  | [3–5]               |
| <b>Mebendazole</b>    | Threonine                              | n (ball milling)  | [3–5]               |
| <b>Mebendazole</b>    | Tyrosine                               | n (ball milling)  | [3–5,42]            |
| <b>Mebendazole</b>    | Valine                                 | n (ball milling)  | [3–5]               |
| <b>Mebendazole</b>    | Aspartic acid-Phenylalanine            | n (ball milling)  | [41]                |
| <b>Mebendazole</b>    | Citrulline                             | n (ball milling)  | [14]                |
| <b>Mebendazole</b>    | Tryptophan-Phenylalanine               | y                 | [42]                |
| <b>Mebendazole</b>    | Aspartic acid-Tyrosine                 | n (ball milling)  | [42]                |
| <b>Mebendazole</b>    | Histidine-Glycine                      | n (ball milling)  | [42]                |
| <b>Mebendazole</b>    | Proline-Tryptophan                     | y                 | [42]                |
| <b>Naproxen</b>       | Arginine                               | y                 | [43–45]             |
| <b>Naproxen</b>       | Tryptophan                             | n (ball milling)  | [43]                |
| <b>Naproxen</b>       | Arginine-Proline                       | y                 | [43]                |
| <b>Naproxen</b>       | Tryptophan-Proline                     | y                 | [43]                |
| <b>Naproxen</b>       | Lysine                                 | y                 | [44]                |
| <b>Naproxen</b>       | Arginine-Sodium dodecyl sulfate        | n (freeze drying) | [44]                |
| <b>Naproxen</b>       | Arginine-Pluronic f 127                | Y                 | [44]                |
| <b>Naproxen</b>       | Arginine-Polyoxyethylene (40) stearate | Y                 | [44]                |
| <b>Naproxen</b>       | Arginine-Tween 20                      | n (freeze drying) | [44]                |
| <b>Naproxen</b>       | Arginine-TPGS 1000                     | n (freeze drying) | [44]                |
| <b>Naproxen</b>       | Lysine-Sodium dodecyl sulfate          | y                 | [44]                |
| <b>Naproxen</b>       | Lysine-Pluronic f 127                  | y                 | [44]                |
| <b>Naproxen</b>       | Lysine-Polyoxyethylene (40) stearate   | y                 | [44]                |
| <b>Naproxen</b>       | Lysine-Tween 20                        | y                 | [44]                |
| <b>Naproxen</b>       | Lysine-TPGS 1000                       | n (freeze drying) | [44]                |
| <b>Nitrofurantoin</b> | Arginine                               | y                 | [14]                |
| <b>Nitrofurantoin</b> | Citrulline                             | y                 | [14]                |
| <b>Ofloxacin</b>      | Tryptophan                             | y                 | [46]                |
| <b>Piroxicam</b>      | Aspartic acid                          | n (ball milling)  | [41]                |
| <b>Piroxicam</b>      | Phenylalanine                          | n (ball milling)  | [41]                |
| <b>Piroxicam</b>      | Aspartic acid-Phenylalanine            | n (ball milling)  | [41]                |
| <b>Simvastatin</b>    | Lysine-Threonine                       | n (ball milling)  | [18]                |
| <b>Simvastatin</b>    | Arginine                               | n (ball milling)  | [3–5]               |
| <b>Simvastatin</b>    | Aspartic acid                          | n (ball milling)  | [3–5,18]            |
| <b>Simvastatin</b>    | Cysteine                               | n (ball milling)  | [3–5]               |
| <b>Simvastatin</b>    | Glutamic acid                          | n (ball milling)  | [3–5]               |
| <b>Simvastatin</b>    | Glycine                                | n (ball milling)  | [3–5]               |
| <b>Simvastatin</b>    | Histidine                              | n (ball milling)  | [3–5]               |
| <b>Simvastatin</b>    | Lysine                                 | y                 | [3–5,7,18,19,47,48] |
| <b>Simvastatin</b>    | Proline                                | n (ball milling)  | [3–5]               |
| <b>Simvastatin</b>    | Phenylalanine                          | y                 | [3–5,7]             |
| <b>Simvastatin</b>    | Tryptophan                             | depends           | [3–5,7,47]          |
| <b>Simvastatin</b>    | Alanine                                | n (ball milling)  | [3–5]               |
| <b>Simvastatin</b>    | Asparagine                             | n (ball milling)  | [3–5]               |
| <b>Simvastatin</b>    | Glutamine                              | n (ball milling)  | [3–5]               |
| <b>Simvastatin</b>    | Isoleucine                             | n (ball milling)  | [3–5]               |
| <b>Simvastatin</b>    | Leucine                                | n (ball milling)  | [3–5,47]            |
| <b>Simvastatin</b>    | Methionine                             | n (ball milling)  | [3–5]               |
| <b>Simvastatin</b>    | Serine                                 | n (ball milling)  | [3–5,18]            |
| <b>Simvastatin</b>    | Threonine                              | n (ball milling)  | [3–5,18]            |
| <b>Simvastatin</b>    | Tyrosine                               | n (ball milling)  | [3–5]               |

|                    |                             |                  |       |
|--------------------|-----------------------------|------------------|-------|
| <b>Simvastatin</b> | Valine                      | n (ball milling) | [3–5] |
| <b>Tadalafil</b>   | Aspartic acid               | n (ball milling) | [41]  |
| <b>Tadalafil</b>   | Phenylalanine               | n (ball milling) | [41]  |
| <b>Tadalafil</b>   | Aspartic acid-Phenylalanine | n (ball milling) | [41]  |
| <b>Valsartan</b>   | Histidine                   | y                | [49]  |
| <b>Valsartan</b>   | Arginine                    | y                | [49]  |
| <b>Valsartan</b>   | Lysine                      | y                | [49]  |
| <b>Valsartan</b>   | Histidine-Arginine          | y                | [49]  |
| <b>Valsartan</b>   | Histidine-Lysine            | y                | [49]  |
| <b>Valsartan</b>   | Arginine-Lysine             | y                | [49]  |

## References

- Lu, W.; Rades, T.; Rantanen, J.; Yang, M. Inhalable co-amorphous budesonide-arginine dry powders prepared by spray drying. *Int. J. Pharm.* **2019**, *565*, 1–8.
- Löbmann, K.; Grohgan, H.; Laitinen, R.; Strachan, C.; Rades, T. Amino acids as co-amorphous stabilizers for poorly water soluble drugs--Part 1: preparation, stability and dissolution enhancement. *Eur. J. Pharm. Biopharm.* **2013**, *85*, 873–881.
- Kasten, G.; Grohgan, H.; Rades, T.; Löbmann, K. Development of a screening method for co-amorphous formulations of drugs and amino acids. *Eur. J. Pharm. Sci.* **2016**, *95*, 28–35.
- Meng-Lund, H.; Kasten, G.; Jensen, K.T.; Poso, A.; Pansar, T.; Rades, T.; Rantanen, J.; Grohgan, H. The use of molecular descriptors in the development of co-amorphous formulations. *Eur. J. Pharm. Sci.* **2018**, *119*, 31–38.
- Chambers, L.I.; Grohgan, H.; Palmelund, H.; Löbmann, K.; Rades, T.; Musa, O.M.; Steed, J.W. Predictive identification of co-formers in co-amorphous systems. *Eur. J. Pharm. Sci.* **2021**, *157*, 105636–105643.
- Ueda, H.; Wu, W.; Löbmann, K.; Grohgan, H.; Mullertz, A.; Rades, T. Application of a salt coformer in a co-amorphous drug system dramatically enhances the glass transition temperature: a case study of the ternary system carbamazepine, citric acid, and L-arginine. *Mol. Pharm.* **2018**, *15*, 2036–2044.
- Kasten, G.; Löbmann, K.; Grohgan, H.; Rades, T. Co-former selection for co-amorphous drug-amino acid formulations. *Int. J. Pharm.* **2019**, *557*, 366–373.
- Mishra, J.; Löbmann, K.; Grohgan, H.; Rades, T. Influence of preparation technique on co-amorphization of carvedilol with acidic amino acids. *Int. J. Pharm.* **2018**, *552*, 407–413.
- Petry, I.; Löbmann, K.; Grohgan, H.; Rades, T.; Leopold, C.S. In situ co-amorphisation in coated tablets - the combination of carvedilol with aspartic acid during immersion in an acidic medium. *Int. J. Pharm.* **2019**, *558*, 357–366.
- Influence of polymer addition on the amorphization, dissolution and physical stability of co-amorphous systems. *Int. J. Pharm.* **2020**, *588*, 119768–119776.
- Liu, J.; Rades, T.; Grohgan, H. Determination of the Optimal Molar Ratio in Amino Acid-Based Coamorphous Systems. *Mol. Pharm.* **2020**, *17*, 1335–1342.
- Kissi, E.; Kasten, G.; Löbmann, K.; Rades, T.; Grohgan, H. The role of glass transition temperatures in co-amorphous drug-amino acid formulations. *Mol. Pharm.* **2018**, *15*, 4247–4256.
- Sterren, V.B.; Aiassa, V.; Garner, C.; Linck, Y.G.; Chatah, A.K.; Monti, G.A.; Longhi, M.R.; Zoppi, A. Preparation of chloramphenicol/amino acid combinations exhibiting enhanced dissolution rates and reduced drug-induced oxidative stress. *AAPS PharmSciTech* **2017**, *18*, 2910–2918.
- Wu, W.; Löbmann, K.; Rades, T.; Grohgan, H. On the role of salt formation and structural similarity of co-formers in co-amorphous drug delivery systems. *Int. J. Pharm.* **2018**, *535*, 86–94.
- Petry, I.; Löbmann, K.; Grohgan, H.; Rades, T.; Leopold, C.S. In situ co-amorphisation of arginine with indomethacin or furosemide during immersion in an acidic medium - a proof of concept study. *Eur. J. Pharm. Biopharm.* **2018**, *133*, 151–160.
- Jensen, K.T.; Larsen, F.H.; Löbmann, K.; Rades, T.; Grohgan, H. Influence of variation in molar ratio on co-amorphous drug-amino acid systems. *Eur. J. Pharm. Biopharm.* **2016**, *107*, 32–39.
- Jensen, K.T.; Larsen, F.H.; Cornett, C.; Löbmann, K.; Grohgan, H.; Rades, T. Formation mechanism of coamorphous drug-amino acid mixtures. *Mol. Pharm.* **2015**, *12*, 2484–2492.
- Laitinen, R.; Löbmann, K.; Grohgan, H.; Strachan, C.; Rades, T. Amino acids as co-amorphous excipients for simvastatin and glibenclamide: physical properties and stability. *Mol. Pharm.* **2014**, *11*, 2381–2389.
- Heikkinen, A.; DeClerck, L.; Löbmann, K.; Grohgan, H.; Rades, T.; Laitinen, R. Dissolution properties of co-amorphous drug-amino acid formulations in buffer and biorelevant media. *Pharmazie* **2015**, *70*, 452–457.
- Sormunen, H.; Ruponen, M.; Laitinen, R. The effect of co-amorphization of glibenclamide on its dissolution properties and permeability through an MDCKII-MDR1 cell layer. *Int. J. Pharm.* **2019**, *570*, 118653.
- Ruponen, M.; Visti, M.; Ojarinta, R.; Laitinen, R. Permeability of glibenclamide through a PAMPA membrane: The effect of co-amorphization. *Eur. J. Pharm. Biopharm.* **2018**, *129*, 247–256.

22. Park, H.; Jin Seo, H.; Hong, S.H.; Ha, E.S.; Lee, S.; Kim, J.S.; Baek, I.H.; Kim, M.S.; Hwang, S.J. Characterization and therapeutic efficacy evaluation of glimepiride and L-arginine co-amorphous formulation prepared by supercritical antisolvent process: Influence of molar ratio and preparation methods. *Int. J. Pharm.* **2020**, *581*, 119232.
23. Franca, M.T.; Marcos, T.M.; Pereira, R.N.; Stulzer, H.K. Could the small molecules such as amino acids improve aqueous solubility and stabilize amorphous systems containing Griseofulvin? *Eur J Pharm Sci* **2020**, *143*, 105178.
24. Ruponen, M.; Rusanen, H.; Laitinen, R. Dissolution and permeability properties of co-amorphous formulations of hydrochlorothiazide. *J. Pharm. Sci.* **2020**, *109*, 2252-2261.
25. Zhang, M.; Suo, Z.; Peng, X.; Gan, N.; Zhao, L.; Tang, P.; Wei, X.; Li, H. Microcrystalline cellulose as an effective crystal growth inhibitor for the ternary Ibrutinib formulation. *Carbohydr. Polym.* **2020**, *229*, 115476.
26. Ojarinta, R.; Lermiaux, L.; Laitinen, R. Spray drying of poorly soluble drugs from aqueous arginine solution. *Int. J. Pharm.* **2017**, *532*, 289-298.
27. Ojarinta, R.; Saarinen, J.; Strachan, C.J.; Korhonen, O.; Laitinen, R. Preparation and characterization of multi-component tablets containing co-amorphous salts: Combining multimodal non-linear optical imaging with established analytical methods. *Eur. J. Pharm. Biopharm.* **2018**, *132*, 112-126.
28. Lenz, E.; Löbmann, K.; Rades, T.; Knop, K.; Kleinebudde, P. Hot melt extrusion and spray drying of co-amorphous indomethacin-arginine with polymers. *J. Pharm. Sci.* **2017**, *106*, 302-312.
29. Ojarinta, R.; Heikkinen, A.T.; Sievanen, E.; Laitinen, R. Dissolution behavior of co-amorphous amino acid-indomethacin mixtures: The ability of amino acids to stabilize the supersaturated state of indomethacin. *Eur. J. Pharm. Biopharm.* **2017**, *112*, 85-95.
30. Petry, I.; Löbmann, K.; Grohgan, H.; Rades, T.; Leopold, C.S. Solid state properties and drug release behavior of co-amorphous indomethacin-arginine tablets coated with Kollicoat® Protect. *Eur. J. Pharm. Biopharm.* **2017**, *119*, 150-160.
31. Mishra, J.; Rades, T.; Löbmann, K.; Grohgan, H. Influence of solvent composition on the performance of spray-dried co-amorphous formulations. *Pharmaceutics* **2018**, *10*.
32. Petry, I.; Löbmann, K.; Grohgan, H.; Rades, T.; Leopold, C.S. Undesired co-amorphisation of indomethacin and arginine during combined storage at high humidity conditions. *Int. J. Pharm.* **2018**, *544*, 172-180.
33. Lenz, E.; Jensen, K.T.; Blaabjerg, L.I.; Knop, K.; Grohgan, H.; Löbmann, K.; Rades, T.; Kleinebudde, P. Solid-state properties and dissolution behaviour of tablets containing co-amorphous indomethacin-arginine. *Eur. J. Pharm. Biopharm.* **2015**, *96*, 44-52.
34. Wickstrom, H.; Palo, M.; Rijckaert, K.; Kolakovic, R.; Nyman, J.O.; Maattanen, A.; Ihalainen, P.; Peltonen, J.; Genina, N.; de Beer, T., et al. Improvement of dissolution rate of indomethacin by inkjet printing. *Eur. J. Pharm. Sci.* **2015**, *75*, 91-100.
35. Jensen, K.T.; Blaabjerg, L.I.; Lenz, E.; Bohr, A.; Grohgan, H.; Kleinebudde, P.; Rades, T.; Lobmann, K. Preparation and characterization of spray-dried co-amorphous drug-amino acid salts. *J. Pharm. Pharmacol.* **2016**, *68*, 615-624.
36. Kasten, G.; Nouri, K.; Grohgan, H.; Rades, T.; Löbmann, K. Performance comparison between crystalline and co-amorphous salts of indomethacin-lysine. *Int. J. Pharm.* **2017**, *533*, 138-144.
37. Walker, G.; Romann, P.; Poller, B.; Löbmann, K.; Grohgan, H.; Rooney, J.S.; Huff, G.S.; Smith, G.P.S.; Rades, T.; Gordon, K.C., et al. Probing pharmaceutical mixtures during milling: the potency of low-frequency raman spectroscopy in identifying disorder. *Mol. Pharm.* **2017**, *14*, 4675-4684.
38. Adhikari, B.R.; Berzins, K.; Fraser-Miller, S.J.; Gordon, K.C.; Das, S.C. Co-amorphization of kanamycin with amino acids improves aerosolization. *Pharmaceutics* **2020**, *12*.
39. Heng, W.; Su, M.; Cheng, H.; Shen, P.; Liang, S.; Zhang, L.; Wei, Y.; Gao, Y.; Zhang, J.; Qian, S. Incorporation of complexation into a coamorphous system dramatically enhances dissolution and eliminates gelation of amorphous lurasidone hydrochloride. *Mol. Pharm.* **2020**, *17*, 84-97.
40. Wu, W.; Grohgan, H.; Rades, T.; Löbmann, K. Comparison of co-former performance in co-amorphous formulations: single amino acids, amino acid physical mixtures, amino acid salts and dipeptides as co-formers. *Eur. J. Pharm. Sci.* **2020**, *156*, 105582-105589.
41. Wu, W.; Löbmann, K.; Schnitzkewitz, J.; Knuhtsen, A.; Pedersen, D.S.; Grohgan, H.; Rades, T. Aspartame as a co-former in co-amorphous systems. *Int. J. Pharm.* **2018**, *549*, 380-387.
42. Wu, W.; Löbmann, K.; Schnitzkewitz, J.; Knuhtsen, A.; Pedersen, D.S.; Rades, T.; Grohgan, H. Dipeptides as co-formers in co-amorphous systems. *Eur. J. Pharm. Biopharm.* **2019**, *134*, 68-76.
43. Jensen, K.T.; Löbmann, K.; Rades, T.; Grohgan, H. Improving co-amorphous drug formulations by the addition of the highly water soluble amino acid, proline. *Pharmaceutics* **2014**, *6*, 416-435.
44. Wostry, M.; Plappert, H.; Grohgan, H. Preparation of co-amorphous systems by freeze-drying. *Pharmaceutics* **2020**, *12*.
45. Kasten, G.; Lobo, L.; Dengale, S.; Grohgan, H.; Rades, T.; Lobmann, K. In vitro and in vivo comparison between crystalline and co-amorphous salts of naproxen-arginine. *Eur. J. Pharm. Biopharm.* **2018**, *132*, 192-199.
46. Zhu, S.; Gao, H.; Babu, S.; Garad, S. Co-amorphous formation of high-dose zwitterionic compounds with amino acids to improve solubility and enable parenteral delivery. *Mol. Pharm.* **2018**, *15*, 97-107.
47. Lu, W.; Rades, T.; Rantanen, J.; Chan, H.K.; Yang, M. Amino acids as stabilizers for spray-dried simvastatin powder for inhalation. *Int. J. Pharm.* **2019**, *572*, 118724.

48. Craye, G.; Lobmann, K.; Grohgan, H.; Rades, T.; Laitinen, R. Characterization of amorphous and co-amorphous simvastatin formulations prepared by spray drying. *Molecules* **2015**, *20*.
49. Huang, Y.; Zhang, Q.; Wang, J.R.; Lin, K.L.; Mei, X. Amino acids as co-amorphous excipients for tackling the poor aqueous solubility of valsartan. *Pharm. Dev. Technol.* **2017**, *22*, 69–76.

**Table S2.** Overview of screened CAMS and non-CAMS with a drug as a co-former. (y: yes. n: no. depends: dependent on the preparation method and/or the preparation parameters. -: unknown).

| Drug 1              | Drug 2                   | CAMS (y/n/depends)      | Reference          |
|---------------------|--------------------------|-------------------------|--------------------|
| <b>Aceclofenac</b>  | Naproxen                 | y                       | [1]                |
| <b>Amoxicillin</b>  | Omeprazole               | y                       | [2]                |
| <b>Atenolol</b>     | Hydrochlorothiazide      | depends                 | [3,4]              |
| <b>Atorvastatin</b> | Carvedilol               | y                       | [5]                |
| <b>Atorvastatin</b> | Glibenclamide            | y                       | [5]                |
| <b>Atorvastatin</b> | Naringin                 | y                       | [6]                |
| <b>Budesonide</b>   | Theophylline             | y                       | [7]                |
| <b>Cimetidine</b>   | Salicylamide             | n (solvent evaporation) | [8]                |
| <b>Cimetidine</b>   | Phenacetin               | n (solvent evaporation) | [8]                |
| <b>Cimetidine</b>   | Diflusal                 | Y                       | [9]                |
| <b>Cimetidine</b>   | Piroxicam                | y                       | [10,11]            |
| <b>Clotrimazole</b> | Carvedilol               | y                       | [12]               |
| <b>Clotrimazole</b> | Indomethacin             | y                       | [12]               |
| <b>Curcumin</b>     | Piperine                 | y                       | [13]               |
| <b>Curcumin</b>     | Artemisinin              | y                       | [14,15]            |
| <b>Docetaxel</b>    | Bicalutamide             | y                       | [16]               |
| <b>Docetaxel</b>    | Myricetin                | y                       | [17]               |
| <b>Ezetimib</b>     | Indapamide               | y                       | [18]               |
| <b>Ezetimib</b>     | Lovastatin               | y                       | [19]               |
| <b>Ezetimib</b>     | Simvastatin              | y                       | [20,21]            |
| <b>Famotidine</b>   | Ibuprofen                | y                       | [22]               |
| <b>Febuxostat</b>   | Indomethacin             | y                       | [23]               |
| <b>Felbinac</b>     | Naproxen                 | n (melt-quench)         | [1]                |
| <b>Flutamide</b>    | Bicalutamide             | y                       | [24]               |
| <b>Gliclazide</b>   | Chlorothiazide           | y                       | [25]               |
| <b>Gliclazide</b>   | Hydrochlorothiazide      | y                       | [25]               |
| <b>Gliclazide</b>   | Indapamide               | y                       | [25]               |
| <b>Gliclazide</b>   | Triamterene              | y                       | [25]               |
| <b>Gliclazide</b>   | Nifedipine               | y                       | [25]               |
| <b>Gliclazide</b>   | Benzamidine              | y                       | [25]               |
| <b>Glipizide</b>    | Atorvastatin             | y                       | [26]               |
| <b>Ibuprofen</b>    | Naproxen                 | n (melt-quench)         | [1]                |
| <b>Indomethacin</b> | Naproxen                 | y                       | [27–30] [1,31–35]  |
| <b>Indomethacin</b> | Acetylsalicylic acid     | y                       | [36]               |
| <b>Indomethacin</b> | Paracetamol              | y                       | [32,33,36,37]      |
| <b>Indomethacin</b> | Glibenclamide            | y                       | [36]               |
| <b>Indomethacin</b> | Cimetidine               | y                       | [8,32,33,35,38–40] |
| <b>Indomethacin</b> | Ranitidine hydrochloride | y                       | [41]               |
| <b>Indomethacin</b> | Antipyrine               | -                       | [42]               |
| <b>Indomethacin</b> | Felodipine               | y                       | [12]               |
| <b>Indomethacin</b> | Cimetidine               | y                       | [12]               |
| <b>Indomethacin</b> | Lidocaine                | y                       | [43]               |
| <b>Indomethacin</b> | Lidocaine hydrochloride  | y                       | [44]               |

|                                 |                         |                  |                     |
|---------------------------------|-------------------------|------------------|---------------------|
| <b>Indomethacin</b>             | Nicotinamide            | y                | [45]                |
| <b>Irbesartan</b>               | Atenolol                | y                | [4]                 |
| <b>Irbesartan</b>               | Glimepiride             | y                | [46]                |
| <b>Itraconazole</b>             | Indomethacin            | y                | [12]                |
| <b>Itraconazole</b>             | Clotrimazole            | y                | [12]                |
| <b>Itraconazole</b>             | Cimetidine              | y                | [12]                |
| <b>Itraconazole</b>             | Carvedilol              | y                | [12]                |
| <b>Ketoprofen</b>               | Naproxen                | y                | [1]                 |
| <b>Lacidipine</b>               | Spironolactone          | y                | [47]                |
| <b>Loxoprofen</b>               | Naproxen                | y                | [1]                 |
| <b>Lurasidone hydrochloride</b> | Puerarin                | y                | [48]                |
| <b>Lurasidone hydrochloride</b> | Repaglinide             | y                | [49]                |
| <b>Mebendazole</b>              | Ascorbic acid           | n (ball milling) | [50]                |
| <b>Mebendazole</b>              | Caffeine                | n (ball milling) | [50]                |
| <b>Mebendazole</b>              | Catechol                | n (ball milling) | [50]                |
| <b>Mebendazole</b>              | Flurbiprofen            | y                | [50]                |
| <b>Mebendazole</b>              | Ketoprofen              | y                | [50]                |
| <b>Mebendazole</b>              | Piracetam               | n (ball milling) | [50]                |
| <b>Mebendazole</b>              | Theophylline            | y                | [50]                |
| <b>Naproxen</b>                 | Cimetidine              | y                | [32,33,35,39,51,52] |
| <b>Naproxen</b>                 | Naproxen sodium         | y                | [1]                 |
| <b>Naproxen sodium</b>          | Indomethacin            | y                | [29]                |
| <b>Nateglinide</b>              | Metformin hydrochloride | y                | [53,54]             |
| <b>Nifedipine</b>               | Cimetidine              | y                | [55]                |
| <b>Nifedipine</b>               | Nimodipine              | y                | [56]                |
| <b>Nifedipine</b>               | Paracetamol             | y                | [34]                |
| <b>Nifedipine</b>               | Naproxen                | y                | [12]                |
| <b>Nifedipine</b>               | Loratadine              | y                | [12]                |
| <b>Nifedipine</b>               | Indomethacin            | y                | [12]                |
| <b>Nifedipine</b>               | Itraconazole            | y                | [12]                |
| <b>Nifedipine</b>               | Salicin                 | y                | [12]                |
| <b>Nimesulide</b>               | Carvedilol              | y                | [55]                |
| <b>Nimesulide</b>               | Indomethacin            | y                | [57]                |
| <b>Olmesartan medoxomil</b>     | Hydrochlorothiazide     | y                | [58]                |
| <b>Paracetamol</b>              | Antipyrine              | y                | [59]                |
| <b>Paracetamol</b>              | Glibenclamide           | y                | [36]                |
| <b>Paracetamol</b>              | Acetylsalicylic acid    | y                | [36]                |
| <b>Paracetamol</b>              | Celecoxib               | y                | [34]                |
| <b>Phenobarbital</b>            | Salicin                 | -                | [42]                |
| <b>Phenobarbital</b>            | Antipyrine              | -                | [42]                |
| <b>Probucol</b>                 | Nifedipine              | y                | [12]                |
| <b>Probucol</b>                 | Itraconazole            | y                | [12]                |
| <b>Probucol</b>                 | Salicin                 | n (melt-quench)  | [12]                |
| <b>Probucol</b>                 | Clotrimazole            | y                | [12]                |
| <b>Probucol</b>                 | Indomethacin            | y                | [12]                |
| <b>Probucol</b>                 | Carvedilol              | n (melt-quench)  | [12]                |
| <b>Probucol</b>                 | Cimetidine              | n (melt-quench)  | [12]                |
| <b>Quercetin</b>                | Ritonavir               | y                | [60]                |
| <b>Ritonavir</b>                | Indomethacin            | y                | [61]                |
| <b>Ritonavir</b>                | Lopinavir               | y                | [62]                |
| <b>Sacubitril</b>               | Valsartan               | y                | [63]                |



|                    |                               |                 |            |
|--------------------|-------------------------------|-----------------|------------|
| <b>Simvastatin</b> | Glipizide                     | y               | [64]       |
| <b>Simvastatin</b> | Nifedipine                    | y               | [65]       |
| <b>Talinolol</b>   | Naringin                      | y               | [66]       |
| <b>Telmisartan</b> | Atenolol                      | n (co-grinding) | [4]        |
| <b>Terfenadine</b> | Paracetamol                   | y               | [36,37]    |
| <b>Terfenadine</b> | Indomethacin                  | y               | [32,36,37] |
| <b>Terfenadine</b> | Acetylsalicylic acid          | y               | [36]       |
| <b>Tranilast</b>   | Diphenhydramine hydrochloride | y               | [67]       |
| <b>Valsartan</b>   | Nifedipine                    | y               | [68]       |

## References

1. Ueda, H.; Muranushi, N.; Sakuma, S.; Ida, Y.; Endoh, T.; Kadota, K.; Tozuka, Y. A Strategy for Co-former Selection to Design Stable Co-amorphous Formations Based on Physicochemical Properties of Non-steroidal Inflammatory Drugs. *Pharm. Res.* **2016**, *33*, 1018–1029, doi:10.1007/s11095-015-1848-2.
2. Russo, M.G.; Sancho, M.I.; Silva, L.M.; Baldoni, H.A.; Venancio, T.; Ellena, J.; Narda, G.E. Looking for the interactions between omeprazole and amoxicillin in a disordered phase. An experimental and theoretical study. *Spectrochim. Acta. A Mol. Biomol. Spectrosc.* **2016**, *156*, 70–77, doi:10.1016/j.saa.2015.11.021.
3. Moinuddin, S.M.; Ruan, S.; Huang, Y.; Gao, Q.; Shi, Q.; Cai, B.; Cai, T. Facile formation of co-amorphous atenolol and hydrochlorothiazide mixtures via cryogenic-milling: Enhanced physical stability, dissolution and pharmacokinetic profile. *Int J Pharm* **2017**, *532*, 393–400, doi:10.1016/j.ijpharm.2017.09.020.
4. Haneef, J.; Chadha, R. Drug-Drug Multicomponent Solid Forms: Cocrystal, Coamorphous and Eutectic of Three Poorly Soluble Antihypertensive Drugs Using Mechanochemical Approach. *AAPS PharmSciTech* **2017**, *18*, 2279–2290, doi:10.1208/s12249-016-0701-1.
5. Shayanfar, A.; Jouyban, A. Drug-Drug Coamorphous Systems: Characterization and Physicochemical Properties of Coamorphous Atorvastatin with Carvedilol and Glibenclamide. *Journal of Pharmaceutical Innovation* **2013**, *8*, 218–228, doi:10.1007/s12247-013-9162-1.
6. Nair, A.; Varma, R.; Gourishetti, K.; Bhat, K.; Dengale, S. Influence of Preparation Methods on Physicochemical and Pharmacokinetic Properties of Co-amorphous Formulations: The Case of Co-amorphous Atorvastatin: Naringin. *Journal of Pharmaceutical Innovation* **2019**, *15*, 365–379, doi:10.1007/s12247-019-09381-9.
7. Leng, D.; Kissi, E.O.; Lobmann, K.; Thanki, K.; Fattal, E.; Rades, T.; Foged, C.; Yang, M. Design of Inhalable Solid Dosage Forms of Budesonide and Theophylline for Pulmonary Combination Therapy. *AAPS PharmSciTech* **2019**, *20*, 137, doi:10.1208/s12249-019-1344-9.
8. Yamamura, S.; Gotoh, H.; Sakamoto, Y.; Momose, Y. Physicochemical properties of amorphous precipitates of cimetidine–indomethacin binary system. *European journal of pharmaceutics and biopharmaceutics* **2000**, *49*, 259–265.
9. Yamamura, S.; Gotoh, H.; Sakamoto, Y.; Momose, Y. Physicochemical properties of amorphous salt of cimetidine and diflunisal system. *Int. J. Pharm.* **2002**, *241*, 213–221.
10. Tantishaiyakul, V.; Songkro, S.; Suknuntha, K.; Permkum, P.; Pipatwarakul, P. Crystal structure transformations and dissolution studies of cimetidine-piroxicam coprecipitates and physical mixtures. *AAPS PharmSciTech* **2009**, *10*, 789–795, doi:10.1208/s12249-009-9263-9.
11. Tantishaiyakul, V.; Suknuntha, K.; Vao-Soongnern, V. Characterization of cimetidine-piroxicam coprecipitate interaction using experimental studies and molecular dynamic simulations. *AAPS PharmSciTech* **2010**, *11*, 952–958, doi:10.1208/s12249-010-9461-5.
12. Mizoguchi, R.; Waraya, H.; Hirakura, Y. Application of Co-Amorphous Technology for Improving the Physicochemical Properties of Amorphous Formulations. *Mol Pharm* **2019**, *16*, 2142–2152, doi:10.1021/acs.molpharmaceut.9b00105.
13. Wang, R.; Han, J.; Jiang, A.; Huang, R.; Fu, T.; Wang, L.; Zheng, Q.; Li, W.; Li, J. Involvement of metabolism-permeability in enhancing the oral bioavailability of curcumin in excipient-free solid dispersions co-formed with piperine. *Int J Pharm* **2019**, *561*, 9–18, doi:10.1016/j.ijpharm.2019.02.027.
14. Suresh, K.; Mannava, M.K.C.; Nangia, A. A novel curcumin–artemisinin coamorphous solid: physical properties and pharmacokinetic profile. *RSC Adv.* **2014**, *4*, 58357–58361, doi:10.1039/c4ra11935e.
15. Mannava, M.K.C.; Suresh, K.; Kumar Bommaka, M.; Bhavani Konga, D.; Nangia, A. Curcumin-Artemisinin Coamorphous Solid: Xenograft Model Preclinical Study. *Pharmaceutics* **2018**, *10*, doi:10.3390/pharmaceutics10010007.
16. Bohr, A.; Nascimento, T.L.; Harmankaya, N.; Weisser, J.J.; Wang, Y.; Grohgan, H.; Rades, T.; Lobmann, K. Efflux Inhibitor Bicalutamide Increases Oral Bioavailability of the Poorly Soluble Efflux Substrate Docetaxel in Co-Amorphous Anti-Cancer Combination Therapy. *Molecules* **2019**, *24*, doi:10.3390/molecules24020266.
17. Wei, Y.; Zhou, S.; Hao, T.; Zhang, J.; Gao, Y.; Qian, S. Further enhanced dissolution and oral bioavailability of docetaxel by coamorphization with a natural P-gp inhibitor myricetin. *Eur J Pharm Sci* **2019**, *129*, 21–30, doi:10.1016/j.ejps.2018.12.016.

18. Knapik, J.; Wojnarowska, Z.; Grzybowska, K.; Jurkiewicz, K.; Tajber, L.; Paluch, M. Molecular Dynamics and Physical Stability of Coamorphous Ezetimib and Indapamide Mixtures. *Mol Pharm* **2015**, *12*, 3610–3619, doi:10.1021/acs.molpharmaceut.5b00334.
19. Riekes, M.K.; Engelen, A.; Appeltans, B.; Rombaut, P.; Stulzer, H.K.; Van den Mooter, G. New Perspectives for Fixed Dose Combinations of Poorly Water-Soluble Compounds: a Case Study with Ezetimibe and Lovastatin. *Pharm. Res.* **2016**, *33*, 1259–1275, doi:10.1007/s11095-016-1870-z.
20. Knapik-Kowalczyk, J.; Chmiel, K.; Jurkiewicz, K.; Correia, N.T.; Sawicki, W.; Paluch, M. Physical Stability and Viscoelastic Properties of Co-Amorphous Ezetimibe/Simvastatin System. *Pharmaceutics (Basel)* **2019**, *12*, doi:10.3390/ph12010040.
21. Phan, A.D.; Knapik-Kowalczyk, J.; Paluch, M.; Hoang, T.X.; Wakabayashi, K. Theoretical Model for the Structural Relaxation Time in Coamorphous Drugs. *Mol Pharm* **2019**, *16*, 2992–2998, doi:10.1021/acs.molpharmaceut.9b00230.
22. Russo, M.G.; Baldoni, H.A.; Davila, Y.A.; Brusau, E.V.; Ellena, J.A.; Narda, G.E. Rational Design of a Famotidine-Ibuprofen Coamorphous System: An Experimental and Theoretical Study. *J Phys Chem B* **2018**, *122*, 8772–8782, doi:10.1021/acs.jpcc.8b06105.
23. Moinuddin, S.M.; Shi, Q.; Tao, J.; Guo, M.; Zhang, J.; Xue, Q.; Ruan, S.; Cai, T. Enhanced Physical Stability and Synchronized Release of Febuxostat and Indomethacin in Coamorphous Solids. *AAPS PharmSciTech* **2020**, *21*, 41, doi:10.1208/s12249-019-1578-6.
24. Pacult, J.; Rams-Baron, M.; Chmiel, K.; Jurkiewicz, K.; Antosik, A.; Szafraniec, J.; Kurek, M.; Jachowicz, R.; Paluch, M. How can we improve the physical stability of co-amorphous system containing flutamide and bicalutamide? The case of ternary amorphous solid dispersions. *Eur J Pharm Sci* **2019**, *136*, 104947, doi:10.1016/j.ejps.2019.06.001.
25. Aljohani, M.; MacFhionnghaile, P.; McArdle, P.; Erxleben, A. Investigation of the formation of drug-drug cocrystals and coamorphous systems of the antidiabetic drug gliclazide. *Int J Pharm* **2019**, *561*, 35–42, doi:10.1016/j.ijpharm.2019.02.024.
26. Renuka; Singh, S.K.; Gulati, M.; Narang, R. Stable amorphous binary systems of glipizide and atorvastatin powders with enhanced dissolution profiles: formulation and characterization. *Pharm Dev Technol* **2017**, *22*, 13–25, doi:10.3109/10837450.2015.1125921.
27. Beyer, A.; Grohgan, H.; Lobmann, K.; Rades, T.; Leopold, C.S. Multivariate Quantification of the Solid State Phase Composition of Co-Amorphous Naproxen-Indomethacin. *Molecules* **2015**, *20*, 19571–19587, doi:10.3390/molecules201019571.
28. Beyer, A.; Grohgan, H.; Lobmann, K.; Rades, T.; Leopold, C.S. Influence of the cooling rate and the blend ratio on the physical stability of co-amorphous naproxen/indomethacin. *Eur J Pharm Biopharm* **2016**, *109*, 140–148, doi:10.1016/j.ejpb.2016.10.002.
29. Beyer, A.; Grohgan, H.; Lobmann, K.; Rades, T.; Leopold, C.S. Improvement of the physicochemical properties of Co-amorphous naproxen-indomethacin by naproxen-sodium. *Int J Pharm* **2017**, *526*, 88–94, doi:10.1016/j.ijpharm.2017.04.011.
30. Beyer, A.; Radi, L.; Grohgan, H.; Lobmann, K.; Rades, T.; Leopold, C.S. Preparation and recrystallization behavior of spray-dried co-amorphous naproxen-indomethacin. *Eur J Pharm Biopharm* **2016**, *104*, 72–81, doi:10.1016/j.ejpb.2016.04.019.
31. Löbmann, K.; Laitinen, R.; Grohgan, H.; Gordon, K.C.; Strachan, C.; Rades, T. Coamorphous Drug Systems: Enhanced Physical Stability and Dissolution Rate of Indomethacin and Naproxen. *Molecular Pharmaceutics* **2011**, *8*, 1919–1928, doi:10.1021/mp2002973.
32. Pajula, K.; Hyyryläinen, J.; Koistinen, A.; Leskinen, J.T.T.; Korhonen, O. Detection of amorphous-amorphous phase separation in small molecular co-amorphous mixtures with SEM-EDS. *Eur J Pharm Biopharm* **2020**, *150*, 43–49, doi:10.1016/j.ejpb.2020.03.002.
33. Chieng, N.; Teo, X.; Cheah, M.H.; Choo, M.L.; Chung, J.; Hew, T.K.; Keng, P.S. Molecular Dynamics and Physical Stability of Pharmaceutical Co-amorphous Systems: Correlation Between Structural Relaxation Times Measured by Kohlrausch-Williams-Watts With the Width of the Glass Transition Temperature ( $\Delta T_g$ ) and the Onset of Crystallization. *J. Pharm. Sci.* **2019**, *108*, 3848–3858, doi:10.1016/j.xphs.2019.09.013.
34. Kissi, E.O.; Khorami, K.; Rades, T. Determination of Stable Co-Amorphous Drug-Drug Ratios from the Eutectic Behavior of Crystalline Physical Mixtures. *Pharmaceutics* **2019**, *11*, doi:10.3390/pharmaceutics11120628.
35. Liu, W.; Liu, Y.; Huang, J.; Lin, Z.; Pan, X.; Zeng, X.; Lamy de la Chapelle, M.; Zhang, Y.; Fu, W. Identification and investigation of the vibrational properties of crystalline and co-amorphous drugs with Raman and terahertz spectroscopy. *Biomed Opt Express* **2019**, *10*, 4290–4304, doi:10.1364/BOE.10.004290.
36. Pajula, K.; Wittoek, L.; Lehto, V.P.; Ketolainen, J.; Korhonen, O. Phase separation in coamorphous systems: in silico prediction and the experimental challenge of detection. *Mol Pharm* **2014**, *11*, 2271–2279, doi:10.1021/mp400712m.
37. Kilpeläinen, T.; Pajula, K.; Ervasti, T.; Uurasjärvi, E.; Koistinen, A.; Korhonen, O. Raman imaging of amorphous-amorphous phase separation in small molecule co-amorphous systems. *Eur J Pharm Biopharm* **2020**, *155*, 49–54, doi:10.1016/j.ejpb.2020.08.007.
38. Otsuka, Y.; Kuwashima, W.; Tanaka, Y.; Yamaki, Y.; Shimada, Y.; Goto, S. Effects of Heat Treatment on Indomethacin-Cimetidine Mixture; Investigation of Drug-Drug Interaction Using Singular Value Decomposition in FTIR Spectroscopy. *J. Pharm. Sci.* **2020**, 10.1016/j.xphs.2020.09.049, doi:10.1016/j.xphs.2020.09.049.
39. Lim, A.W.; Lobmann, K.; Grohgan, H.; Rades, T.; Chieng, N. Investigation of physical properties and stability of indomethacin-cimetidine and naproxen-cimetidine co-amorphous systems prepared by quench cooling, coprecipitation and ball milling. *J Pharm Pharmacol* **2016**, *68*, 36–45, doi:10.1111/jphp.12494.

40. Arnfast, L.; Kamruzzaman, M.; Lobmann, K.; Aho, J.; Baldursdottir, S.; Rades, T.; Rantanen, J. Melt Extrusion of High-Dose Co-Amorphous Drug-Drug Combinations : Theme: Formulation and Manufacturing of Solid Dosage Forms Guest Editors: Tony Zhou and Tonglei Li. *Pharm. Res.* **2017**, *34*, 2689–2697, doi:10.1007/s11095-017-2254-8.
41. Chieng, N.; Aaltonen, J.; Saville, D.; Rades, T. Physical characterization and stability of amorphous indomethacin and ranitidine hydrochloride binary systems prepared by mechanical activation. *Eur J Pharm Biopharm* **2009**, *71*, 47–54, doi:10.1016/j.ejpb.2008.06.022.
42. FUKUOKA, E.; MAKITA, M.; YAMAMURA, S. Glassy state of pharmaceuticals. III.: Thermal properties and stability of glassy pharmaceuticals and their binary glass systems. *Chemical and pharmaceutical bulletin* **1989**, *37*, 1047–1050.
43. Shimada, Y.; Goto, S.; Uchiro, H.; Hirabayashi, H.; Yamaguchi, K.; Hirota, K.; Terada, H. Features of heat-induced amorphous complex between indomethacin and lidocaine. *Colloids Surf. B. Biointerfaces* **2013**, *102*, 590–596, doi:10.1016/j.colsurfb.2012.08.060.
44. Shimada, Y.; Goto, S.; Uchiro, H.; Hirota, K.; Terada, H. Characteristics of amorphous complex formed between indomethacin and lidocaine hydrochloride. *Colloids Surf. B. Biointerfaces* **2013**, *105*, 98–105, doi:10.1016/j.colsurfb.2012.12.026.
45. Tawfeek, H.M.; Chavan, T.; Kunda, N.K. Effect of Spray Drying on Amorphization of Indomethacin Nicotinamide Cocrystals; Optimization, Characterization, and Stability Study. *AAPS PharmSciTech* **2020**, *21*, 181, doi:10.1208/s12249-020-01732-x.
46. Cruz-Angeles, J.; Videa, M.; Martinez, L.M. Highly Soluble Glimepiride and Irbesartan Co-amorphous Formulation with Potential Application in Combination Therapy. *AAPS PharmSciTech* **2019**, *20*, 144, doi:10.1208/s12249-019-1359-2.
47. Wang, Z.; Sun, M.; Liu, T.; Gao, Z.; Ye, Q.; Tan, X.; Hou, Y.; Sun, J.; Wang, D.; He, Z. Co-amorphous solid dispersion systems of lacidipine-spironolactone with improved dissolution rate and enhanced physical stability. *Asian J Pharm Sci* **2019**, *14*, 95–103, doi:10.1016/j.ajps.2018.11.001.
48. Wang, S.; Heng, W.; Wang, X.; He, X.; Zhang, Z.; Wei, Y.; Zhang, J.; Gao, Y.; Qian, S. Coamorphization combined with complexation enhances dissolution of lurasidone hydrochloride and puerarin with synchronized release. *Int J Pharm* **2020**, *588*, 119793, doi:10.1016/j.ijpharm.2020.119793.
49. Qian, S.; Li, Z.; Heng, W.; Liang, S.; Ma, D.; Gao, Y.; Zhang, J.; Wei, Y. Charge-assisted intermolecular hydrogen bond formed in coamorphous system is important to relieve the pH-dependent solubility behavior of lurasidone hydrochloride. *RSC Advances* **2016**, *6*, 106396–106412, doi:10.1039/c6ra18022a.
50. Chambers, L.I.; Grohgan, H.; Palmelund, H.; Lobmann, K.; Rades, T.; Musa, O.M.; Steed, J.W. Predictive Identification of Co-formers in Co-amorphous Systems. *Eur J Pharm Sci* **2020**, *10.1016/j.ejps.2020.105636*, 105636, doi:10.1016/j.ejps.2020.105636.
51. Alleso, M.; Chieng, N.; Rehder, S.; Rantanen, J.; Rades, T.; Aaltonen, J. Enhanced dissolution rate and synchronized release of drugs in binary systems through formulation: Amorphous naproxen-cimetidine mixtures prepared by mechanical activation. *J Control Release* **2009**, *136*, 45–53, doi:10.1016/j.jconrel.2009.01.027.
52. Yamamura, S.; Momose, Y.; Takahashi, K.; Nagatani, S. Solid-state interaction between cimetidine and naproxen. *Drug Stability* **1996**, *1*, 173–178.
53. Wairkar, S.; Gaud, R. Co-Amorphous Combination of Nateglinide-Metformin Hydrochloride for Dissolution Enhancement. *AAPS PharmSciTech* **2016**, *17*, 673–681, doi:10.1208/s12249-015-0371-4.
54. Wairkar, S.; Gaud, R. Development and Characterization of Microstructured, Spray-Dried Co-Amorphous Mixture of Antidiabetic Agents Stabilized by Silicate. *AAPS PharmSciTech* **2019**, *20*, 141, doi:10.1208/s12249-019-1352-9.
55. Martinez, L.M.; Videa, M.; Sosa, N.G.; Ramirez, J.H.; Castro, S. Long-Term Stability of New Co-Amorphous Drug Binary Systems: Study of Glass Transitions as a Function of Composition and Shelf Time. *Molecules* **2016**, *21*, doi:10.3390/molecules21121712.
56. Knapik-Kowalczyk, J.; Tu, W.; Chmiel, K.; Rams-Baron, M.; Paluch, M. Co-Stabilization of Amorphous Pharmaceuticals-The Case of Nifedipine and Nimodipine. *Mol Pharm* **2018**, *15*, 2455–2465, doi:10.1021/acs.molpharmaceut.8b00308.
57. Wang, M.; Liu, S.; Jia, L.; Zhang, J.; Du, S.; Gong, J. Exploring the physical stability of three nimesulide-indomethacin co-amorphous systems from the perspective of molecular aggregates. *Eur J Pharm Sci* **2020**, *147*, 105294, doi:10.1016/j.ejps.2020.105294.
58. Abdelquader, M.M.; Essa, E.A.; El Maghraby, G.M. Inhibition of Co-Crystallization of Olmesartan Medoxomil and Hydrochlorothiazide for Enhanced Dissolution Rate in Their Fixed Dose Combination. *AAPS PharmSciTech* **2018**, *20*, 3, doi:10.1208/s12249-018-1207-9.
59. Martinez, L.M.; Videa, M.; Lopez-Silva, G.A.; de Los Reyes, C.A.; Cruz-Angeles, J.; Gonzalez, N. Stabilization of amorphous paracetamol based systems using traditional and novel strategies. *Int J Pharm* **2014**, *477*, 294–305, doi:10.1016/j.ijpharm.2014.10.021.
60. Dengale, S.J.; Hussen, S.S.; Krishna, B.S.; Musmade, P.B.; Gautham Shenoy, G.; Bhat, K. Fabrication, solid state characterization and bioavailability assessment of stable binary amorphous phases of Ritonavir with Quercetin. *Eur J Pharm Biopharm* **2015**, *89*, 329–338, doi:10.1016/j.ejpb.2014.12.025.
61. Dengale, S.J.; Ranjan, O.P.; Hussen, S.S.; Krishna, B.S.; Musmade, P.B.; Gautham Shenoy, G.; Bhat, K. Preparation and characterization of co-amorphous Ritonavir-Indomethacin systems by solvent evaporation technique: improved dissolution behavior and physical stability without evidence of intermolecular interactions. *Eur J Pharm Sci* **2014**, *62*, 57–64, doi:10.1016/j.ejps.2014.05.015.

62. Sai Krishna Anand, V.; Sakhare, S.D.; Navya Sree, K.S.; Nair, A.R.; Raghava Varma, K.; Gourishetti, K.; Dengale, S.J. The relevance of co-amorphous formulations to develop supersaturated dosage forms: In-vitro, and ex-vivo investigation of Ritonavir-Lopinavir co-amorphous materials. *Eur J Pharm Sci* **2018**, *123*, 124–134, doi:10.1016/j.ejps.2018.07.046.
63. Zhang, Y.; Gao, Y.; Du, X.; Guan, R.; He, Z.; Liu, H. Combining Co-Amorphous-Based Spray Drying with Inert Carriers to Achieve Improved Bioavailability and Excellent Downstream Manufacturability. *Pharmaceutics* **2020**, *12*, doi:10.3390/pharmaceutics12111063.
64. Lobmann, K.; Strachan, C.; Grohgan, H.; Rades, T.; Korhonen, O.; Laitinen, R. Co-amorphous simvastatin and glipizide combinations show improved physical stability without evidence of intermolecular interactions. *Eur J Pharm Biopharm* **2012**, *81*, 159–169, doi:10.1016/j.ejpb.2012.02.004.
65. Martinez-Jimenez, C.; Cruz-Angeles, J.; Vide, M.; Martinez, L.M. Co-Amorphous Simvastatin-Nifedipine with Enhanced Solubility for Possible Use in Combination Therapy of Hypertension and Hypercholesterolemia. *Molecules* **2018**, *23*, doi:10.3390/molecules23092161.
66. Teja, A.; Musmade, P.B.; Khade, A.B.; Dengale, S.J. Simultaneous improvement of solubility and permeability by fabricating binary glassy materials of Talinolol with Naringin: Solid state characterization, in-vivo in-situ evaluation. *Eur J Pharm Sci* **2015**, *78*, 234–244, doi:10.1016/j.ejps.2015.08.002.
67. Ueda, H.; Kadota, K.; Imono, M.; Ito, T.; Kunita, A.; Tozuka, Y. Co-amorphous Formation Induced by Combination of Tranilast and Diphenhydramine Hydrochloride. *J. Pharm. Sci.* **2017**, *106*, 123–128, doi:10.1016/j.xphs.2016.07.009.
68. Lodagekar, A.; Chavan, R.B.; Mannava, M.K.C.; Yadav, B.; Chella, N.; Nangia, A.K.; Shastri, N.R. Co amorphous valsartan nifedipine system: Preparation, characterization, in vitro and in vivo evaluation. *Eur J Pharm Sci* **2019**, *139*, 105048, doi:10.1016/j.ejps.2019.105048.

**Table S3.** Overview of screened CAMS and non-CAMS with organic acids as co-formers. (y: yes. n: no. –: unknown).

| Drug          | Organic Acid         | CAMS                         | Reference |
|---------------|----------------------|------------------------------|-----------|
| Acyclovir     | Tartaric acid        | n (solvent evaporation)      | [1]       |
| Acyclovir     | Citric acid          | y                            | [1]       |
| Azelnidipine  | Oxalic acid          | y                            | [2]       |
| Azelnidipine  | Maleic acid          | y                            | [3]       |
| Carbamazepine | Citric acid          | y                            | [4]       |
| Carbamazepine | Benzoic acid         | y                            | [5]       |
| Carbamazepine | Maleic acid          | y                            | [5]       |
| Carbamazepine | Succinic acid        | y                            | [5]       |
| Carbamazepine | Tartaric acid        | y                            | [5]       |
| Carvedilol    | Benzoic acid         | y                            | [6]       |
| Carvedilol    | Malic acid           | y                            | [6]       |
| Carvedilol    | Citric acid          | y                            | [6]       |
| Ciprofloxacin | Tartaric acid        | y                            | [7]       |
| Ciprofloxacin | Succinic acid        | y                            | [8]       |
| Clozapine     | Tartaric acid        | y                            | [9]       |
| Clozapine     | Citric acid          | y                            | [9]       |
| Clozapine     | Oxalic acid          | y                            | [9]       |
| Curcumin      | Folic acid dihydrate | y                            | [10]      |
| Curcumin      | Suberic acid         | n (Liquid-assisted grinding) | [10]      |
| Desloratadine | Benzoic acid         | y                            | [11]      |
| Ibrutinib     | Tartaric acid        | n (ball milling)             | [12]      |
| Ibrutinib     | Citric acid          | y                            | [12]      |
| Ibrutinib     | Succinic acid        | y                            | [12]      |
| Ibrutinib     | Oxalic acid          | y                            | [12]      |
| Indomethacin  | Citric acid          | y                            | [13]      |
| Itraconazole  | Fumaric acid         | y                            | [14]      |
| Itraconazole  | Tartaric acid        | y                            | [14]      |
| Ketoconazole  | Oxalic acid          | y                            | [15,16]   |
| Ketoconazole  | Tartaric acid        | y                            | [15,16]   |
| Ketoconazole  | Citric acid          | y                            | [15,16]   |

|                          |                           |                  |         |
|--------------------------|---------------------------|------------------|---------|
| <b>Ketoconazole</b>      | Succinic acid             | y                | [15,16] |
| <b>Loratadine</b>        | Citric acid               | y                | [17]    |
| <b>Mebendazole</b>       | 2,4-Dihydroxybenzoic acid | y                | [18]    |
| <b>Mebendazole</b>       | 3,5-Dihydroxybenzoic acid | y                | [18]    |
| <b>Mebendazole</b>       | 3-Aminobenzoic acid       | n (ball milling) | [18]    |
| <b>Mebendazole</b>       | 4-Aminobenzoic acid       | y                | [18]    |
| <b>Mebendazole</b>       | 4-Aminosalicylic acid     | y                | [18]    |
| <b>Mebendazole</b>       | 5-Aminosalicylic acid     | n (ball milling) | [18]    |
| <b>Mebendazole</b>       | Fumaric acid              | y                | [18]    |
| <b>Mebendazole</b>       | Gallic acid               | y                | [18]    |
| <b>Mebendazole</b>       | Glycolic acid             | n (ball milling) | [18]    |
| <b>Mebendazole</b>       | Maleic acid               | y                | [18]    |
| <b>Mebendazole</b>       | Oxalic acid               | y                | [18]    |
| <b>Mebendazole</b>       | Succinic acid             | n (ball milling) | [18]    |
| <b>Mebendazole</b>       | Tartaric acid             | n (ball milling) | [18]    |
| <b>Mirabegron</b>        | Fumaric acid              | y                | [19]    |
| <b>Mirabegron</b>        | Pyroglutamic acid         | y                | [19]    |
| <b>Mirabegron</b>        | Citric acid               | y                | [19]    |
| <b>Naproxen</b>          | Flufenamic acid           | y                | [20]    |
| <b>Olanzapine</b>        | Ascorbic acid             | y                | [21]    |
| <b>Olanzapine</b>        | Citric acid               | y                | [21]    |
| <b>Olanzapine</b>        | Tartaric acid             | y                | [21]    |
| <b>Paracetamol</b>       | Citric acid               | y                | [22,23] |
| <b>Paracetamol</b>       | Citric acid anhydrate     | y                | [23]    |
| <b>Rofecoxib</b>         | Citric acid               | -                | [24]    |
| <b>Sulfamerazine</b>     | Citric acid               | y                | [25]    |
| <b>Sulfamerazine</b>     | Deoxycholic acid          | y                | [26]    |
| <b>Sulfamerazine</b>     | Oxalic acid               | y                | [27]    |
| <b>Sulfamerazine</b>     | Tartaric acid             | y                | [27]    |
| <b>Sulfamerazine</b>     | Citric acid               | y                | [26,27] |
| <b>Sulfamerazine</b>     | Adipic acid               | n (ball milling) | [27]    |
| <b>Sulfamerazine</b>     | Barbituric acid           | y                | [27]    |
| <b>Sulfamerazine</b>     | Fumaric acid              | y                | [27]    |
| <b>Sulfamerazine</b>     | Glutaric acid             | n (ball milling) | [27]    |
| <b>Sulfamerazine</b>     | Maleic acid               | n (ball milling) | [27]    |
| <b>Sulfamerazine</b>     | Malonic acid              | n (ball milling) | [27]    |
| <b>Sulfamerazine</b>     | Pimelic acid              | n (ball milling) | [27]    |
| <b>Sulfamerazine</b>     | Succinic acid             | n (ball milling) | [27]    |
| <b>Sulfamerazine</b>     | Terephthalic acid         | n (ball milling) | [27]    |
| <b>Sulfathiazole I</b>   | Oxalic acid               | n (ball milling) | [28]    |
| <b>Sulfathiazole I</b>   | Tartaric acid             | y                | [28]    |
| <b>Sulfathiazole I</b>   | Citric acid               | y                | [28]    |
| <b>Sulfathiazole I</b>   | Fumaric acid              | n (ball milling) | [28]    |
| <b>Sulfathiazole I</b>   | Malic acid                | n (ball milling) | [28]    |
| <b>Sulfathiazole I</b>   | Malonic acid              | n (ball milling) | [28]    |
| <b>Sulfathiazole I</b>   | Succinic acid             | n (ball milling) | [28]    |
| <b>Sulfathiazole I</b>   | Glutaric acid             | n (ball milling) | [28]    |
| <b>Sulfathiazole I</b>   | Adipic acid               | n (ball milling) | [28]    |
| <b>Sulfathiazole I</b>   | Pimelic acid              | n (ball milling) | [28]    |
| <b>Sulfathiazole III</b> | Oxalic acid               | n (ball milling) | [28]    |
| <b>Sulfathiazole III</b> | Tartaric acid             | y                | [28]    |

|                          |               |                  |      |
|--------------------------|---------------|------------------|------|
| <b>Sulfathiazole III</b> | Citric acid   | y                | [28] |
| <b>Sulfathiazole III</b> | Fumaric acid  | n (ball milling) | [28] |
| <b>Sulfathiazole III</b> | Malic acid    | n (ball milling) | [28] |
| <b>Sulfathiazole III</b> | Malonic acid  | n (ball milling) | [28] |
| <b>Sulfathiazole III</b> | Succinic acid | n (ball milling) | [28] |
| <b>Sulfathiazole III</b> | Glutaric acid | n (ball milling) | [28] |
| <b>Sulfathiazole III</b> | Adipic acid   | n (ball milling) | [28] |
| <b>Sulfathiazole III</b> | Pimelic acid  | n (ball milling) | [28] |
| <b>Sulfathiazole V</b>   | Oxalic acid   | n (ball milling) | [28] |
| <b>Sulfathiazole V</b>   | Tartaric acid | y                | [28] |
| <b>Sulfathiazole V</b>   | Citric acid   | y                | [28] |
| <b>Sulfathiazole V</b>   | Fumaric acid  | n (ball milling) | [28] |
| <b>Sulfathiazole V</b>   | Malic acid    | n (ball milling) | [28] |
| <b>Sulfathiazole V</b>   | Malonic acid  | n (ball milling) | [28] |
| <b>Sulfathiazole V</b>   | Succinic acid | n (ball milling) | [28] |
| <b>Sulfathiazole V</b>   | Glutaric acid | n (ball milling) | [28] |
| <b>Sulfathiazole V</b>   | Adipic acid   | n (ball milling) | [28] |
| <b>Sulfathiazole V</b>   | Pimelic acid  | n (ball milling) | [28] |

## References

- Masuda, T.; Yoshihashi, Y.; Yonemochi, E.; Fujii, K.; Uekusa, H.; Terada, K. Cocrystallization and amorphization induced by drug-excipient interaction improves the physical properties of acyclovir. *Int J Pharm* **2012**, *422*, 160–169, doi:10.1016/j.ijpharm.2011.10.046.
- Pan, Y.; Pang, W.; Lv, J.; Wang, J.; Yang, C.; Guo, W. Solid state characterization of azelnidipine-oxalic acid co-crystal and co-amorphous complexes: The effect of different azelnidipine polymorphs. *J Pharm Biomed Anal* **2017**, *138*, 302–315, doi:10.1016/j.jpba.2017.02.005.
- Han, Y.; Pan, Y.; Lv, J.; Guo, W.; Wang, J. Powder grinding preparation of co-amorphous  $\beta$ -azelnidipine and maleic acid combination: Molecular interactions and physicochemical properties. *Powder Technol.* **2016**, *291*, 110–120, doi:10.1016/j.powtec.2015.11.068.
- Ueda, H.; Wu, W.; Lobmann, K.; Grohgan, H.; Mullertz, A.; Rades, T. Application of a Salt Coformer in a Co-Amorphous Drug System Dramatically Enhances the Glass Transition Temperature: A Case Study of the Ternary System Carbamazepine, Citric Acid, and L-Arginine. *Mol Pharm* **2018**, *15*, 2036–2044, doi:10.1021/acs.molpharmaceut.8b00174.
- Wu, W.; Wang, Y.; Lobmann, K.; Grohgan, H.; Rades, T. Transformations between co-amorphous and co-crystal systems and their influence on the formation and physical stability of co-amorphous systems. *Molecular Pharmaceutics* **2019**, *10.1021/acs.molpharmaceut.8b01229*, doi:10.1021/acs.molpharmaceut.8b01229.
- Wu, W.; Ueda, H.; Lobmann, K.; Rades, T.; Grohgan, H. Organic acids as co-formers for co-amorphous systems - Influence of variation in molar ratio on the physicochemical properties of the co-amorphous systems. *Eur J Pharm Biopharm* **2018**, *131*, 25–32, doi:10.1016/j.ejpb.2018.07.016.
- Mohammed, A.; Zurek, J.; Madueke, S.; Al-Kassimy, H.; Yaqoob, M.; Houacine, C.; Ferraz, A.; Kalgudi, R.; Zariwala, M.G.; Hawkins, N., et al. Generation of High Dose Inhalable Effervescent Dispersions against *Pseudomonas aeruginosa* Biofilms. *Pharm. Res.* **2020**, *37*, 150, doi:10.1007/s11095-020-02878-w.
- Paluch, K.J.; McCabe, T.; Muller-Bunz, H.; Corrigan, O.I.; Healy, A.M.; Tajber, L. Formation and physicochemical properties of crystalline and amorphous salts with different stoichiometries formed between ciprofloxacin and succinic acid. *Mol Pharm* **2013**, *10*, 3640–3654, doi:10.1021/mp400127r.
- Ali, A.M.; Ali, A.A.; Maghrabi, I.A. Clozapine-carboxylic acid plasticized co-amorphous dispersions: Preparation, characterization and solution stability evaluation. *Acta. Pharm.* **2015**, *65*, 133–146, doi:10.1515/acph-2015-0014.
- Skieneh, J.M.; Sathisaran, I.; Dalvi, S.V.; Rohani, S. Co-amorphous Form of Curcumin–Folic Acid Dihydrate with Increased Dissolution Rate. *Cryst. Growth Des.* **2017**, *17*, 6273–6280, doi:10.1021/acs.cgd.7b00947.
- Ainurofiq, A.; Mauludin, R.; Mudhakir, D.; Soewandhi, S.N. A Novel Desloratadine-Benzoinic Acid Co-Amorphous Solid: Preparation, Characterization, and Stability Evaluation. *Pharmaceutics* **2018**, *10*, doi:10.3390/pharmaceutics10030085.
- Zhang, M.; Suo, Z.; Peng, X.; Gan, N.; Zhao, L.; Tang, P.; Wei, X.; Li, H. Microcrystalline cellulose as an effective crystal growth inhibitor for the ternary lbrutinib formulation. *Carbohydr. Polym.* **2020**, *229*, 115476, doi:10.1016/j.carbpol.2019.115476.
- Lu, Q.; Zografi, G. Phase behavior of binary and ternary amorphous mixtures containing indomethacin, citric acid, and PVP. *Pharm. Res.* **1998**, *15*, 1202–1206.

14. Yamamoto, K.; Kojima, T.; Karashima, M.; Ikeda, Y. Physicochemical evaluation and developability assessment of co-amorphous of low soluble drugs and comparison to the co-crystals. *Chemical and Pharmaceutical Bulletin* **2016**, c16-00604.
15. Fung, M.; Be Rzins, K.R.; Suryanarayanan, R. Physical Stability and Dissolution Behavior of Ketoconazole-Organic Acid Coamorphous Systems. *Mol Pharm* **2018**, *15*, 1862-1869, doi:10.1021/acs.molpharmaceut.8b00035.
16. Fung, M.H.; DeVault, M.; Kuwata, K.T.; Suryanarayanan, R. Drug-Excipient Interactions: Effect on Molecular Mobility and Physical Stability of Ketoconazole-Organic Acid Coamorphous Systems. *Mol Pharm* **2018**, *15*, 1052-1061, doi:10.1021/acs.molpharmaceut.7b00932.
17. Wang, J.; Chang, R.; Zhao, Y.; Zhang, J.; Zhang, T.; Fu, Q.; Chang, C.; Zeng, A. Coamorphous Loratadine-Citric Acid System with Enhanced Physical Stability and Bioavailability. *AAPS PharmSciTech* **2017**, *18*, 2541-2550, doi:10.1208/s12249-017-0734-0.
18. Chambers, L.I.; Grohgan, H.; Palmelund, H.; Lobmann, K.; Rades, T.; Musa, O.M.; Steed, J.W. Predictive Identification of Co-formers in Co-amorphous Systems. *Eur J Pharm Sci* **2020**, 10.1016/j.ejps.2020.105636, 105636, doi:10.1016/j.ejps.2020.105636.
19. An, J.H.; Lim, C.; Kiyonga, A.N.; Chung, I.H.; Lee, I.K.; Mo, K.; Park, M.; Youn, W.; Choi, W.R.; Suh, Y.G., et al. Co-Amorphous Screening for the Solubility Enhancement of Poorly Water-Soluble Mirabegron and Investigation of Their Intermolecular Interactions and Dissolution Behaviors. *Pharmaceutics* **2018**, *10*, doi:10.3390/pharmaceutics10030149.
20. Ueda, H.; Muranushi, N.; Sakuma, S.; Ida, Y.; Endoh, T.; Kadota, K.; Tozuka, Y. A Strategy for Co-former Selection to Design Stable Co-amorphous Formations Based on Physicochemical Properties of Non-steroidal Inflammatory Drugs. *Pharm. Res.* **2016**, *33*, 1018-1029, doi:10.1007/s11095-015-1848-2.
21. Maher, E.M.; Ali, A.M.; Salem, H.F.; Abdelrahman, A.A. In vitro/in vivo evaluation of an optimized fast dissolving oral film containing olanzapine co-amorphous dispersion with selected carboxylic acids. *Drug Deliv* **2016**, *23*, 3088-3100, doi:10.3109/10717544.2016.1153746.
22. Hoppu, P.; Hietala, S.; Schantz, S.; Juppo, A.M. Rheology and molecular mobility of amorphous blends of citric acid and paracetamol. *Eur J Pharm Biopharm* **2009**, *71*, 55-63, doi:10.1016/j.ejpb.2008.06.029.
23. Hoppu, P.; Jouppila, K.; Rantanen, J.; Schantz, S.; Juppo, A.M. Characterisation of blends of paracetamol and citric acid. *J Pharm Pharmacol* **2007**, *59*, 373-381, doi:10.1211/jpp.59.3.0006.
24. Ahuja, N.; Katore, O.P.; Singh, B. Studies on dissolution enhancement and mathematical modeling of drug release of a poorly water-soluble drug using water-soluble carriers. *Eur J Pharm Biopharm* **2007**, *65*, 26-38, doi:10.1016/j.ejpb.2006.07.007.
25. Hirakawa, Y.; Ueda, H.; Takata, Y.; Minamihata, K.; Wakabayashi, R.; Kamiya, N.; Goto, M. Co-amorphous formation of piroxicam-citric acid to generate supersaturation and improve skin permeation. *Eur J Pharm Sci* **2021**, *158*, 105667, doi:10.1016/j.ejps.2020.105667.
26. Gniado, K.; Lobmann, K.; Rades, T.; Erxleben, A. The influence of co-formers on the dissolution rates of co-amorphous sulfamerazine/excipient systems. *Int J Pharm* **2016**, *504*, 20-26, doi:10.1016/j.ijpharm.2016.03.023.
27. Macfhionnghaile, P.; Hu, Y.; Gniado, K.; Curran, S.; McArdle, P.; Erxleben, A. Effects of ball-milling and cryomilling on sulfamerazine polymorphs: a quantitative study. *J. Pharm. Sci.* **2014**, *103*, 1766-1778, doi:10.1002/jps.23978.
28. Hu, Y.; Gniado, K.; Erxleben, A.; McArdle, P. Mechanochemical Reaction of Sulfathiazole with Carboxylic Acids: Formation of a Cocrystal, a Salt, and Coamorphous Solids. *Cryst. Growth Des.* **2014**, *14*, 803-813, doi:10.1021/cg401673z.

**Table S4.** Overview of screened CAMS and non-CAMS with various (other) co-formers. (y: yes. n: no. -: unknown).

| Drug                        | Coformer            | CAMS             | Reference |
|-----------------------------|---------------------|------------------|-----------|
| <b>6-Mercaptopurine</b>     | Sodium taurocholate | y                | [1]       |
| <b>Acyclovir</b>            | Sodium taurocholate | y                | [1]       |
| <b>Allopurinol</b>          | Sodium taurocholate | y                | [1]       |
| <b>Amoxicillin</b>          | Sodium taurocholate | y                | [1]       |
| <b>Atenolol</b>             | Urea                | y                | [2]       |
| <b>Atorvastatin calcium</b> | Nicotinamide        | y                | [3]       |
| <b>Azithromycin</b>         | N-Acetylcysteine    | y                | [4]       |
| <b>Benzamidine</b>          | Sodium taurocholate | y                | [1]       |
| <b>Carbamazepine</b>        | Sodium taurocholate | y                | [1]       |
| <b>Carbamazepine</b>        | Tannic acid         | y                | [5]       |
| <b>Carbamazepine</b>        | Saccharin           | y                | [6]       |
| <b>Carbamazepine</b>        | Nicotinamide        | y                | [6]       |
| <b>Ciprofloxacin</b>        | Sodium taurocholate | y                | [1]       |
| <b>Ciprofloxacin</b>        | N-Acetylcysteine    | n (spray drying) | [4]       |
| <b>Curcumin</b>             | Piperazine          | y                | [7]       |

|                                 |                                           |                   |      |
|---------------------------------|-------------------------------------------|-------------------|------|
| <b>Diflusal</b>                 | Sodium taurocholate                       | y                 | [1]  |
| <b>Glibenclamide</b>            | Quercetin                                 | y                 | [8]  |
| <b>Hydrochlorothiazide</b>      | Sodium lauryl sulfate                     | n (ball milling)  | [9]  |
| <b>Ibrutinib</b>                | Oxalic acid                               | y                 | [10] |
| <b>Ibrutinib</b>                | Saccharin                                 | y                 | [11] |
| <b>Ibuprofen</b>                | Nicotinamide                              | y                 | [12] |
| <b>Ibuprofen</b>                | Sodium taurocholate                       | y                 | [1]  |
| <b>Indomethacin</b>             | Sodium taurocholate                       | y                 | [1]  |
| <b>Indomethacin</b>             | Tannic acid                               | Y                 | [5]  |
| <b>Lurasidone hydrochloride</b> | Saccharin                                 | y                 | [13] |
| <b>Mebendazole</b>              | Glutamic acid-Arginine                    | n (ball milling)  | [14] |
| <b>Mebendazole</b>              | Arginine-Glutamic acid                    | n (ball milling)  | [14] |
| <b>Mebendazole</b>              | Aspartame                                 | y                 | [15] |
| <b>Mebendazole</b>              | Tryptophan-Phenylalanine                  | y                 | [16] |
| <b>Mebendazole</b>              | Phenylalanine-Tryptophan                  | y                 | [16] |
| <b>Mebendazole</b>              | Aspartic acid-Tyrosine                    | y                 | [16] |
| <b>Mebendazole</b>              | Histidine-Glycine                         | y                 | [16] |
| <b>Mebendazole</b>              | Proline-Tryptophan                        | y                 | [16] |
| <b>Mebendazole</b>              | Glutamic acid-Arginine (crystalline salt) | y                 | [14] |
| <b>Mebendazole</b>              | Glutamic acid-Arginine (amorphous salt)   | y                 | [14] |
| <b>Mebendazole</b>              | 4,4'-Bipyridine                           | n (ball milling)  | [17] |
| <b>Mebendazole</b>              | Imidazole                                 | n (ball milling)  | [17] |
| <b>Mebendazole</b>              | Isonicotinamide                           | n (ball milling)  | [17] |
| <b>Mebendazole</b>              | Nicotinamide                              | n (ball milling)  | [17] |
| <b>Mebendazole</b>              | Phenazine                                 | n (ball milling)  | [17] |
| <b>Mebendazole</b>              | Piperazine                                | n (ball milling)  | [17] |
| <b>Mebendazole</b>              | Pyrogallol                                | y                 | [17] |
| <b>Mebendazole</b>              | Salicylic acid                            | y                 | [17] |
| <b>Mebendazole</b>              | Urea                                      | n (ball milling)  | [17] |
| <b>Mefenamic acid</b>           | Sodium taurocholate                       | y                 | [1]  |
| <b>Naproxen</b>                 | Sodium taurocholate                       | y                 | [1]  |
| <b>Naproxen</b>                 | Meglumine                                 | y                 | [18] |
| <b>Nifedipine</b>               | Sodium taurocholate                       | y                 | [1]  |
| <b>Norfloxacin</b>              | Sodium taurocholate                       | y                 | [1]  |
| <b>Olanzapine</b>               | Saccharin                                 | y                 | [19] |
| <b>Paracetamol</b>              | Sodium taurocholate                       | y                 | [1]  |
| <b>Piroxicam</b>                | Aspartame                                 | y                 | [15] |
| <b>Probutol</b>                 | Maltitol                                  | n (melt-quench)   | [20] |
| <b>Quetiapine</b>               | Nicotinamide                              | n (freeze drying) | [21] |
| <b>Quinine</b>                  | Sodium taurocholate                       | y                 | [1]  |
| <b>Repaglinide</b>              | Saccharin                                 | y                 | [22] |
| <b>Rofecoxib</b>                | Mannitol                                  | -                 | [23] |
| <b>Rofecoxib</b>                | Sorbitol                                  | -                 | [23] |
| <b>Rofecoxib</b>                | Urea                                      | -                 | [23] |
| <b>Rofecoxib</b>                | Nicotinamide                              | -                 | [23] |
| <b>ROY</b>                      | Pyrogallol                                | y                 | [24] |
| <b>Sulfamerazine</b>            | Sodium taurocholate                       | y                 | [1]  |
| <b>Sulfamerazine</b>            | Mannitol                                  | n (melt-quench)   | [25] |
| <b>Sulfamerazine</b>            | Saccharin                                 | n (melt-quench)   | [25] |
| <b>Sulfamerazine</b>            | Sorbitol                                  | n (melt-quench)   | [25] |
| <b>Sulfathiazole</b>            | Sodium taurocholate                       | y                 | [1]  |



|                     |                  |   |      |
|---------------------|------------------|---|------|
| <b>Tadalafil</b>    | Aspartame        | y | [15] |
| <b>Tobramycin</b>   | N-Acetylcysteine | y | [4]  |
| <b>Ursolic acid</b> | Piperine         | y | [26] |
| <b>Valsartan</b>    | Vanillin         | y | [27] |

## References

- Gniado, K.; MacFhionnghaile, P.; McArdle, P.; Erxleben, A. The natural bile acid surfactant sodium taurocholate (NaTC) as a coformer in coamorphous systems: Enhanced physical stability and dissolution behavior of coamorphous drug-NaTC systems. *Int J Pharm* **2018**, *535*, 132–139, doi:10.1016/j.ijpharm.2017.10.049.
- Hirakawa, Y.; Ueda, H.; Miyano, T.; Kamiya, N.; Goto, M. New insight into transdermal drug delivery with supersaturated formulation based on co-amorphous system. *Int J Pharm* **2019**, *569*, 118582, doi:10.1016/j.ijpharm.2019.118582.
- Shayanfar, A.; Jouyban, A. Drug–Drug Coamorphous Systems: Characterization and Physicochemical Properties of Coamorphous Atorvastatin with Carvedilol and Glibenclamide. *Journal of Pharmaceutical Innovation* **2013**, *8*, 218–228, doi:10.1007/s12247-013-9162-1.
- Lababidi, N.; Ofosu Kissi, E.; Elgaher, W.A.M.; Sigal, V.; Haupenthal, J.; Schwarz, B.C.; Hirsch, A.K.H.; Rades, T.; Schneider, M. Spray-drying of inhalable, multifunctional formulations for the treatment of biofilms formed in cystic fibrosis. *J Control Release* **2019**, *314*, 62–71, doi:10.1016/j.jconrel.2019.10.038.
- Fael, H.; Demirel, A.L. Tannic acid as a co-former in co-amorphous systems: Enhancing their physical stability, solubility and dissolution behavior. *Int J Pharm* **2020**, *581*, 119284, doi:10.1016/j.ijpharm.2020.119284.
- Wu, W.; Wang, Y.; Loebmann, K.; Grohgan, H.; Rades, T. Transformations between co-amorphous and co-crystal systems and their influence on the formation and physical stability of co-amorphous systems. *Molecular Pharmaceutics* **2019**, *10*, 1021/acs.molpharmaceut.8b01229, doi:10.1021/acs.molpharmaceut.8b01229.
- Pang, W.; Lv, J.; Du, S.; Wang, J.; Wang, J.; Zeng, Y. Preparation of Curcumin-Piperazine Coamorphous Phase and Fluorescence Spectroscopic and Density Functional Theory Simulation Studies on the Interaction with Bovine Serum Albumin. *Mol Pharm* **2017**, *14*, 3013–3024, doi:10.1021/acs.molpharmaceut.7b00217.
- Sormunen, H.; Ruponen, M.; Laitinen, R. The effect of co-amorphization of glibenclamide on its dissolution properties and permeability through an MDCKII-MDR1 cell layer. *Int J Pharm* **2019**, *570*, 118653, doi:10.1016/j.ijpharm.2019.118653.
- Ruponen, M.; Rusanen, H.; Laitinen, R. Dissolution and Permeability Properties of Co-Amorphous Formulations of Hydrochlorothiazide. *J. Pharm. Sci.* **2020**, *109*, 2252–2261, doi:10.1016/j.xphs.2020.04.008.
- Zhang, M.; Suo, Z.; Peng, X.; Gan, N.; Zhao, L.; Tang, P.; Wei, X.; Li, H. Microcrystalline cellulose as an effective crystal growth inhibitor for the ternary Ibrutinib formulation. *Carbohydr. Polym.* **2020**, *229*, 115476, doi:10.1016/j.carbpol.2019.115476.
- Shi, X.; Song, S.; Ding, Z.; Fan, B.; Huang, W.; Xu, T. Improving the Solubility, Dissolution, and Bioavailability of Ibrutinib by Preparing It in a Coamorphous State With Saccharin. *J. Pharm. Sci.* **2019**, *108*, 3020–3028, doi:10.1016/j.xphs.2019.04.031.
- Bi, Y.; Xiao, D.; Ren, S.; Bi, S.; Wang, J.; Li, F. The Binary System of Ibuprofen-Nicotinamide Under Nanoscale Confinement: From Cocrystal to Coamorphous State. *J. Pharm. Sci.* **2017**, *106*, 3150–3155, doi:10.1016/j.xphs.2017.06.005.
- Qian, S.; Heng, W.; Wei, Y.; Zhang, J.; Gao, Y. Coamorphous Lurasidone Hydrochloride–Saccharin with Charge-Assisted Hydrogen Bonding Interaction Shows Improved Physical Stability and Enhanced Dissolution with pH-Independent Solubility Behavior. *Cryst. Growth Des.* **2015**, *15*, 2920–2928, doi:10.1021/acs.cgd.5b00349.
- Wu, W.; Grohgan, H.; Rades, T.; Lobmann, K. Comparison of co-former performance in co-amorphous formulations: single amino acids, amino acid physical mixtures, amino acid salts and dipeptides as co-formers. *Eur J Pharm Sci* **2020**, *10*, 1016/j.ejps.2020.105582, 105582, doi:10.1016/j.ejps.2020.105582.
- Wu, W.; Lobmann, K.; Schnitzkewitz, J.; Knuhtsen, A.; Pedersen, D.S.; Grohgan, H.; Rades, T. Aspartame as a co-former in co-amorphous systems. *Int J Pharm* **2018**, *549*, 380–387, doi:10.1016/j.ijpharm.2018.07.063.
- Wu, W.; Lobmann, K.; Schnitzkewitz, J.; Knuhtsen, A.; Pedersen, D.S.; Rades, T.; Grohgan, H. Dipeptides as co-formers in co-amorphous systems. *Eur J Pharm Biopharm* **2019**, *134*, 68–76, doi:10.1016/j.ejpb.2018.11.016.
- Chambers, L.I.; Grohgan, H.; Palmelund, H.; Lobmann, K.; Rades, T.; Musa, O.M.; Steed, J.W. Predictive Identification of Co-formers in Co-amorphous Systems. *Eur J Pharm Sci* **2020**, *10*, 1016/j.ejps.2020.105636, 105636, doi:10.1016/j.ejps.2020.105636.
- Liu, X.; Zhou, L.; Zhang, F. Reactive Melt Extrusion To Improve the Dissolution Performance and Physical Stability of Naproxen Amorphous Solid Dispersions. *Mol Pharm* **2017**, *14*, 658–673, doi:10.1021/acs.molpharmaceut.6b00960.
- da Costa, N.F.; Fernandes, A.I.; Pinto, J.F. Measurement of the amorphous fraction of olanzapine incorporated in a co-amorphous formulation. *Int J Pharm* **2020**, *588*, 119716, doi:10.1016/j.ijpharm.2020.119716.
- Mizoguchi, R.; Waraya, H.; Hirakura, Y. Application of Co-Amorphous Technology for Improving the Physicochemical Properties of Amorphous Formulations. *Mol Pharm* **2019**, *16*, 2142–2152, doi:10.1021/acs.molpharmaceut.9b00105.
- Ali, A.M.; Al-Remawi, M.M. Freeze Dried Quetiapine-Nicotinamide Binary Solid Dispersions: A New Strategy for Improving Physicochemical Properties and Ex Vivo Diffusion. *J Pharm (Cairo)* **2016**, *2016*, 2126056, doi:10.1155/2016/2126056.

22. Gao, Y.; Liao, J.; Qi, X.; Zhang, J. Coamorphous repaglinide-saccharin with enhanced dissolution. *Int J Pharm* **2013**, *450*, 290-295, doi:10.1016/j.ijpharm.2013.04.032.
23. Ahuja, N.; Katare, O.P.; Singh, B. Studies on dissolution enhancement and mathematical modeling of drug release of a poorly water-soluble drug using water-soluble carriers. *Eur J Pharm Biopharm* **2007**, *65*, 26-38, doi:10.1016/j.ejpb.2006.07.007.
24. Corner, P.A.; Harburn, J.J.; Steed, J.W.; McCabe, J.F.; Berry, D.J. Stabilisation of an amorphous form of ROY through a predicted co-former interaction. *Chem. Commun. (Camb.)* **2016**, *52*, 6537-6540, doi:10.1039/c6cc02949c.
25. Macfhionnghaile, P.; Hu, Y.; Gniado, K.; Curran, S.; McArdle, P.; Erxleben, A. Effects of ball-milling and cryomilling on sulfamerazine polymorphs: a quantitative study. *J. Pharm. Sci.* **2014**, *103*, 1766-1778, doi:10.1002/jps.23978.
26. Yu, D.; Kan, Z.; Shan, F.; Zang, J.; Zhou, J. Triple Strategies to Improve Oral Bioavailability by Fabricating Coamorphous Forms of Ursolic Acid with Piperine: Enhancing Water-Solubility, Permeability, and Inhibiting Cytochrome P450 Isozymes. *Mol Pharm* **2020**, *17*, 4443-4462, doi:10.1021/acs.molpharmaceut.0c00443.
27. Hashim Ali, K.; Mohsin Ansari, M.; Ali Shah, F.; Ud Din, F.; Abdul Basit, M.; Kim, J.K.; Zeb, A. Enhanced dissolution of valsartan-vanillin binary co-amorphous system loaded in mesoporous silica particles. *J Microencapsul* **2019**, *36*, 10-20, doi:10.1080/02652048.2019.1579265.
