# Supplementary material for: Co-Amorphous Drug Formulations in Numbers: Recent Advances in Co-Amorphous Drug Formulations with Focus on Co-Formability, Molar Ratio, Preparation Methods, Physical Stability, In Vitro and In Vivo Performance, and New Formulation Strategies
Source: Pharmaceutics. 2021 Mar 15;13(3):389. doi: 10.3390/pharmaceutics13030389 (PMC7999207; doi:10.3390/pharmaceutics13030389)
Supplement: Supplementary file 1 [file pharmaceutics-13-00389-s001.zip]

Archive with 4 entries (4 files):
- Appendix B.pdf
- Appendix C.pdf
- Appendix D.pdf
- Supplementary Materials.pdf
